# Supplementary material for: CD4+ T Cell Activation and Peripheral Immune Cell Influx into the Brain Following Wildfire Smoke Exposure is Modulated by a Saturated Fat Diet
Source: Research Square preprint supplement (doi:10.21203/rs.3.rs-8712658/v1), 2026-02-13
Supplement: Supplementary file 1 [file 8fbe622b3d4fddfa51e3a110.docx]

**Figure S1**

*Exposure Chamber Layout*

**
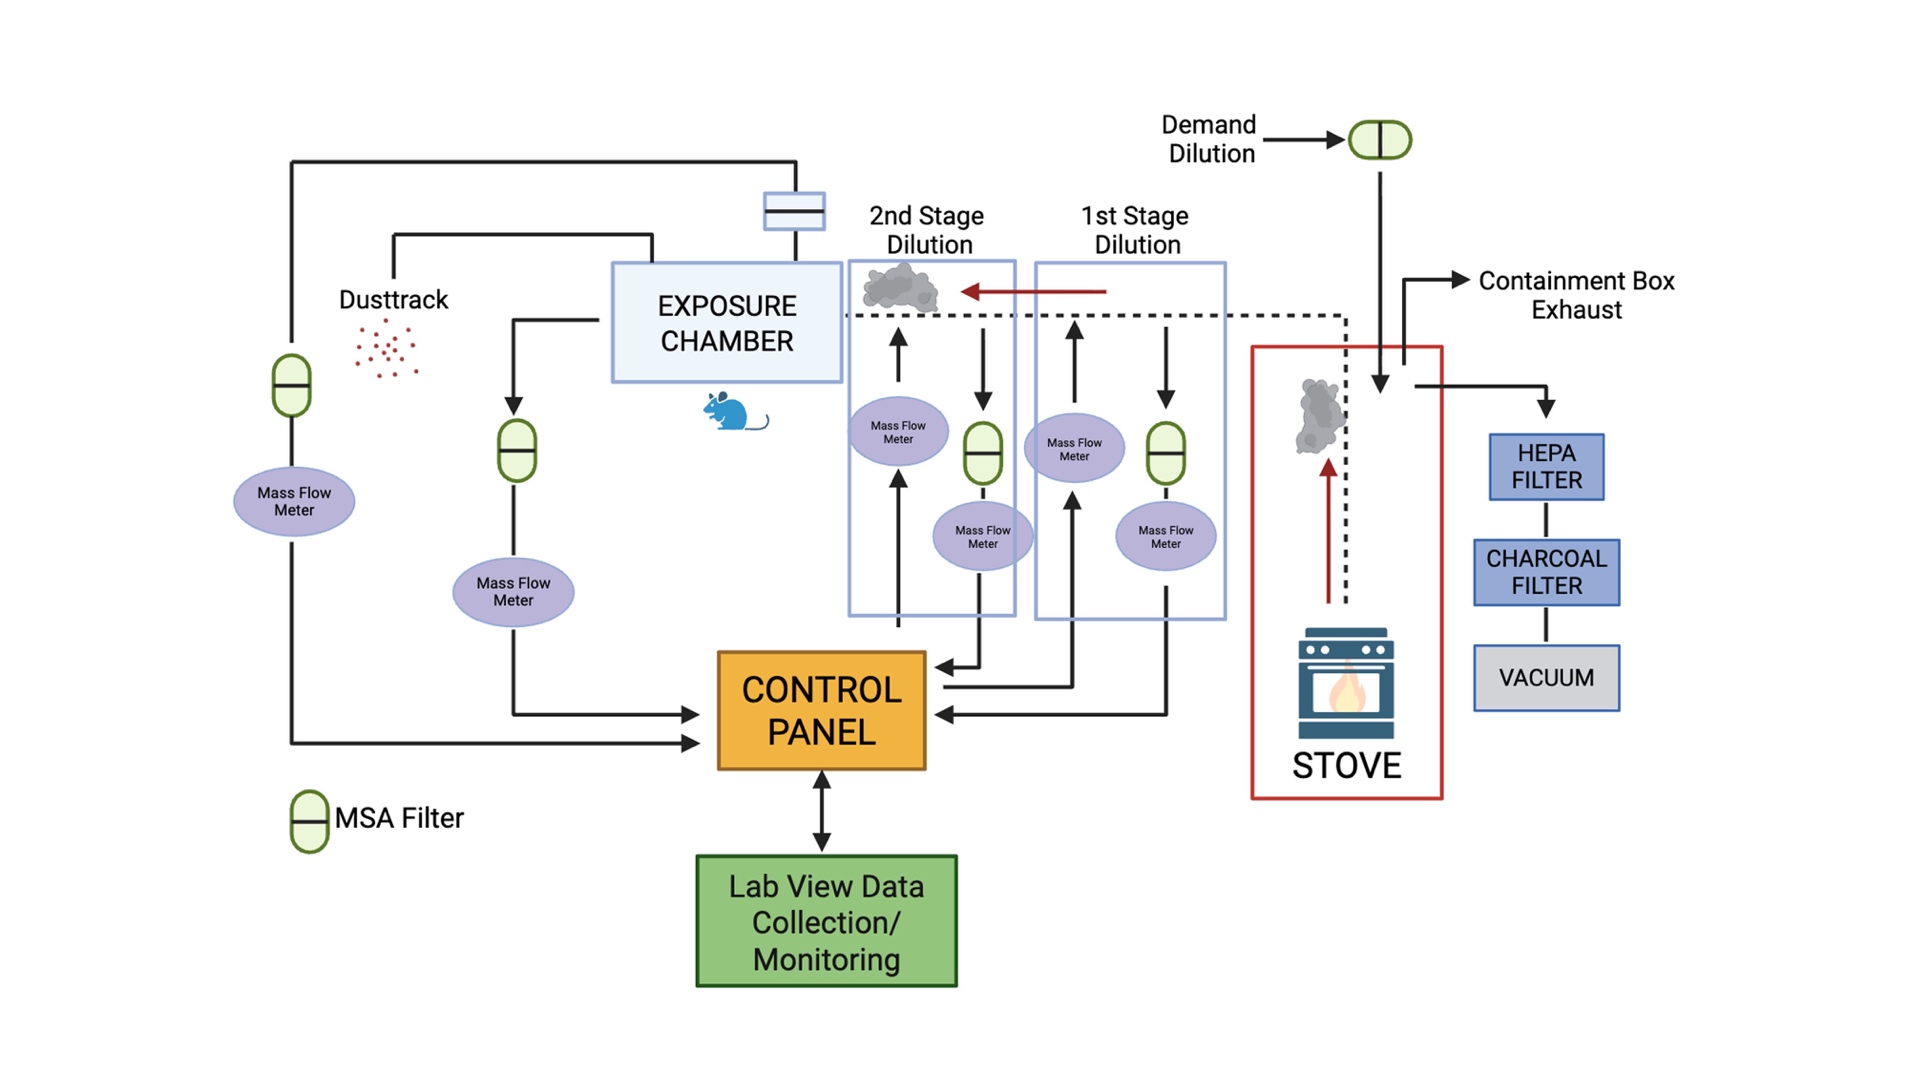
**

**Figure S2**

*Flow Cytometry Analysis Gating Strategy*

*
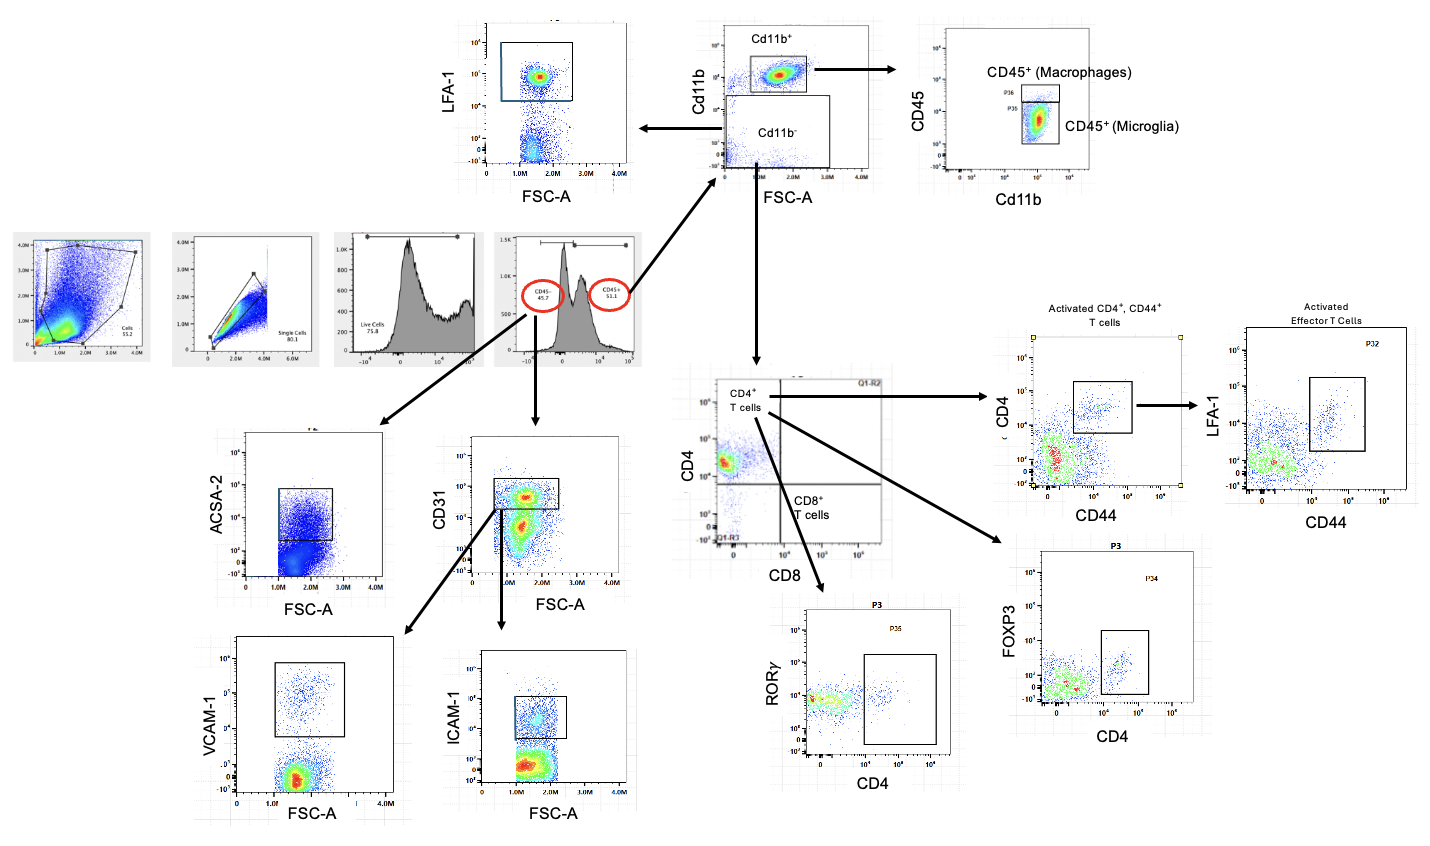
*

**Figure S3**

*Flow Cytometry Staining Markers*

| *Cellular Marker* | *Fluorophore* |
| --- | --- |
| *CD45* | *PerCP* |
| *CD44* | *Super Bright 780* |
| *CD3* | *eFluor 506* |
| *CD4* | *eFluor 450* |
| *CD25* | *APC Fire 810* |
| *FOXP3* | *eFluor 660* |
| *RORy* | *PE-Cyanine 7* |
| *CD11b* | *Brilliant Violet 480* |
| *CD31* | *Super Bright 645* |
| *ICAM* | *PE Dazzle 594* |
| *VCAM* | *Brilliant Violet 750* |
| *LFA-1 (CD11a)* | *Brilliant Violet 605* |
| *ACSA-2* | *APC* |

**Figure S4**

*Gating Strategy for CD45+ Peripheral Immune Cells*


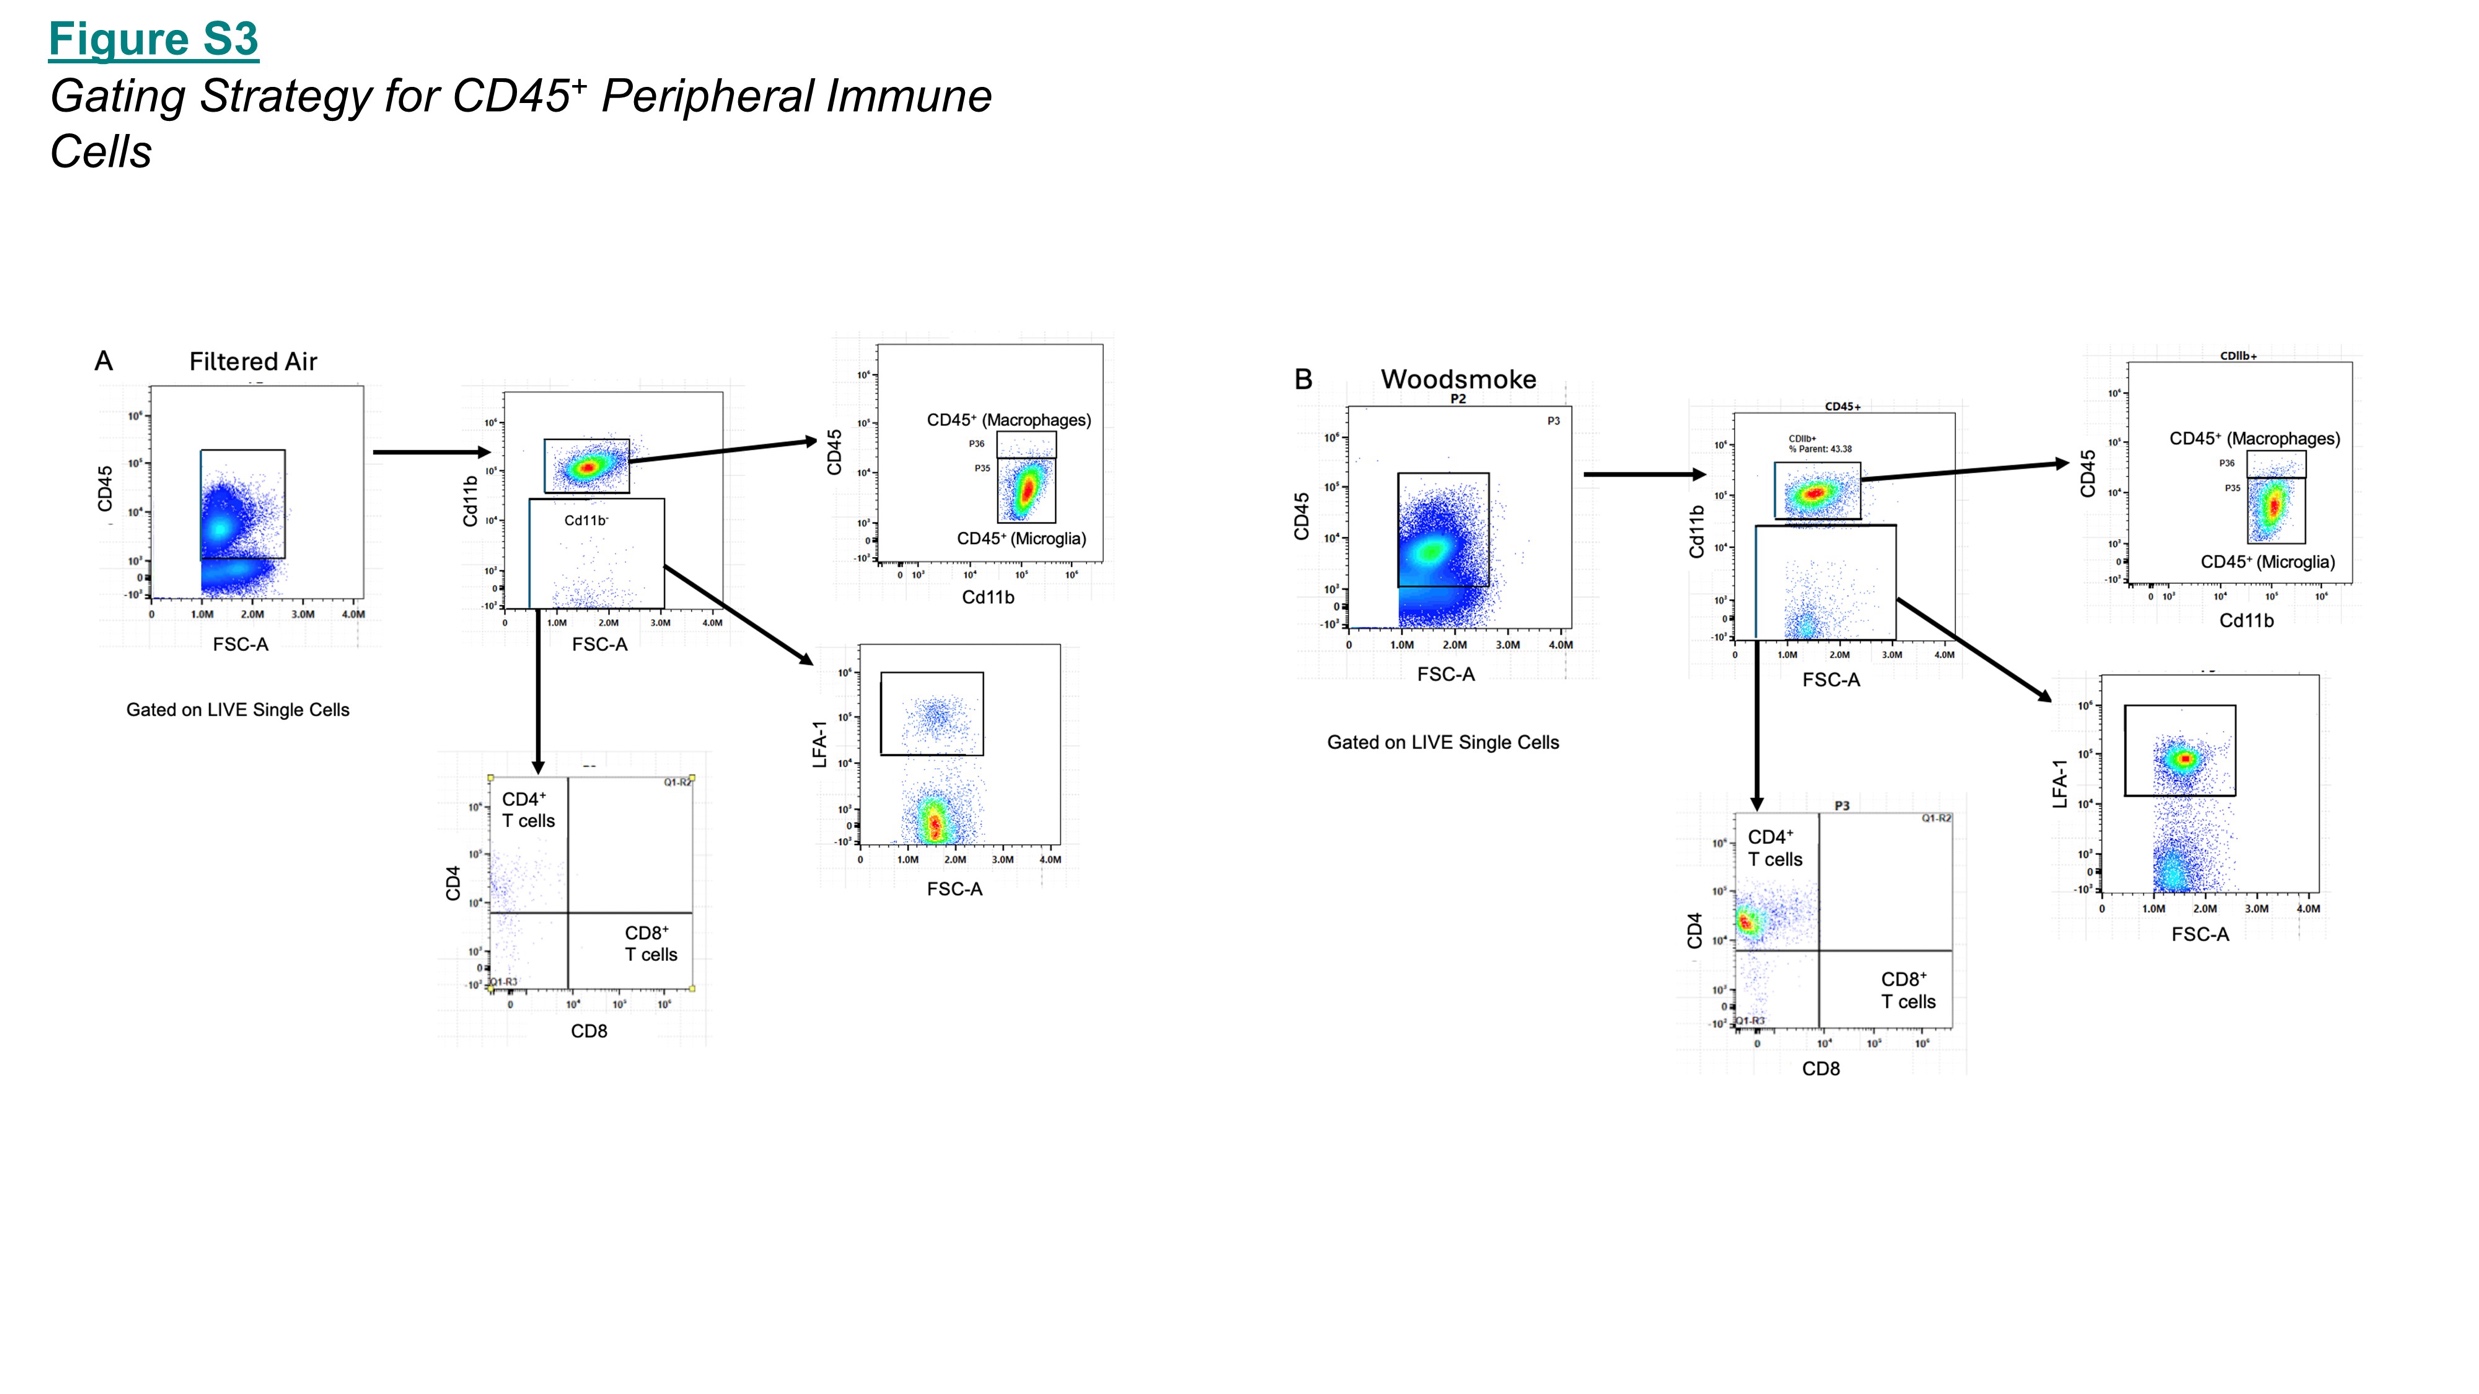


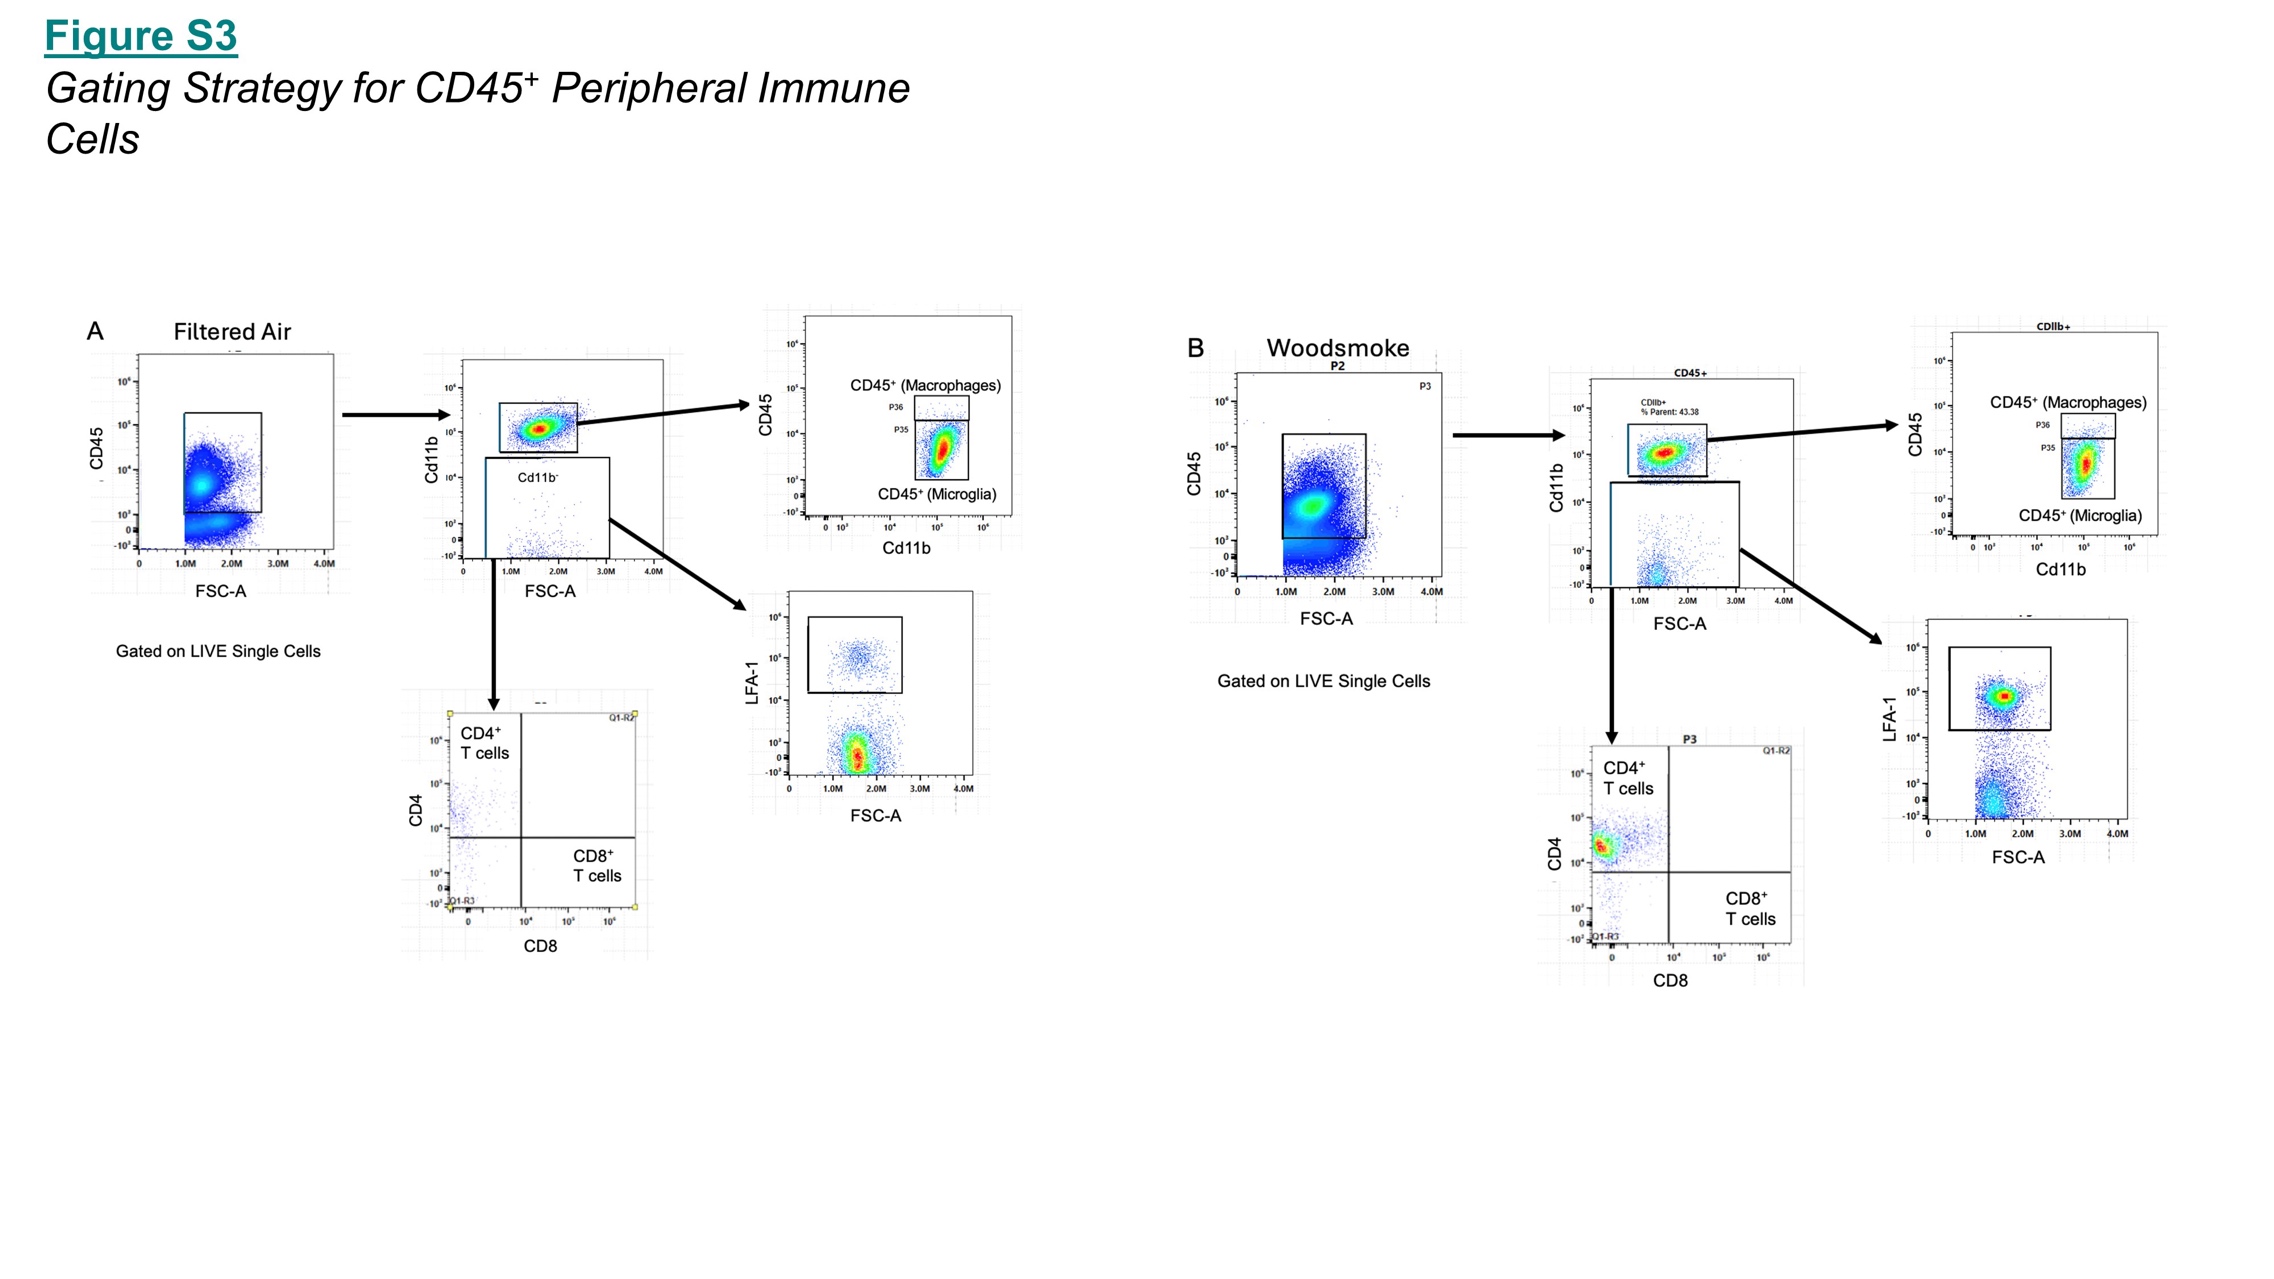


**Figure S5**

*Gating Strategy for CD45- Resident Glial Cells and Peripheral Immune Cells*

Filtered Air


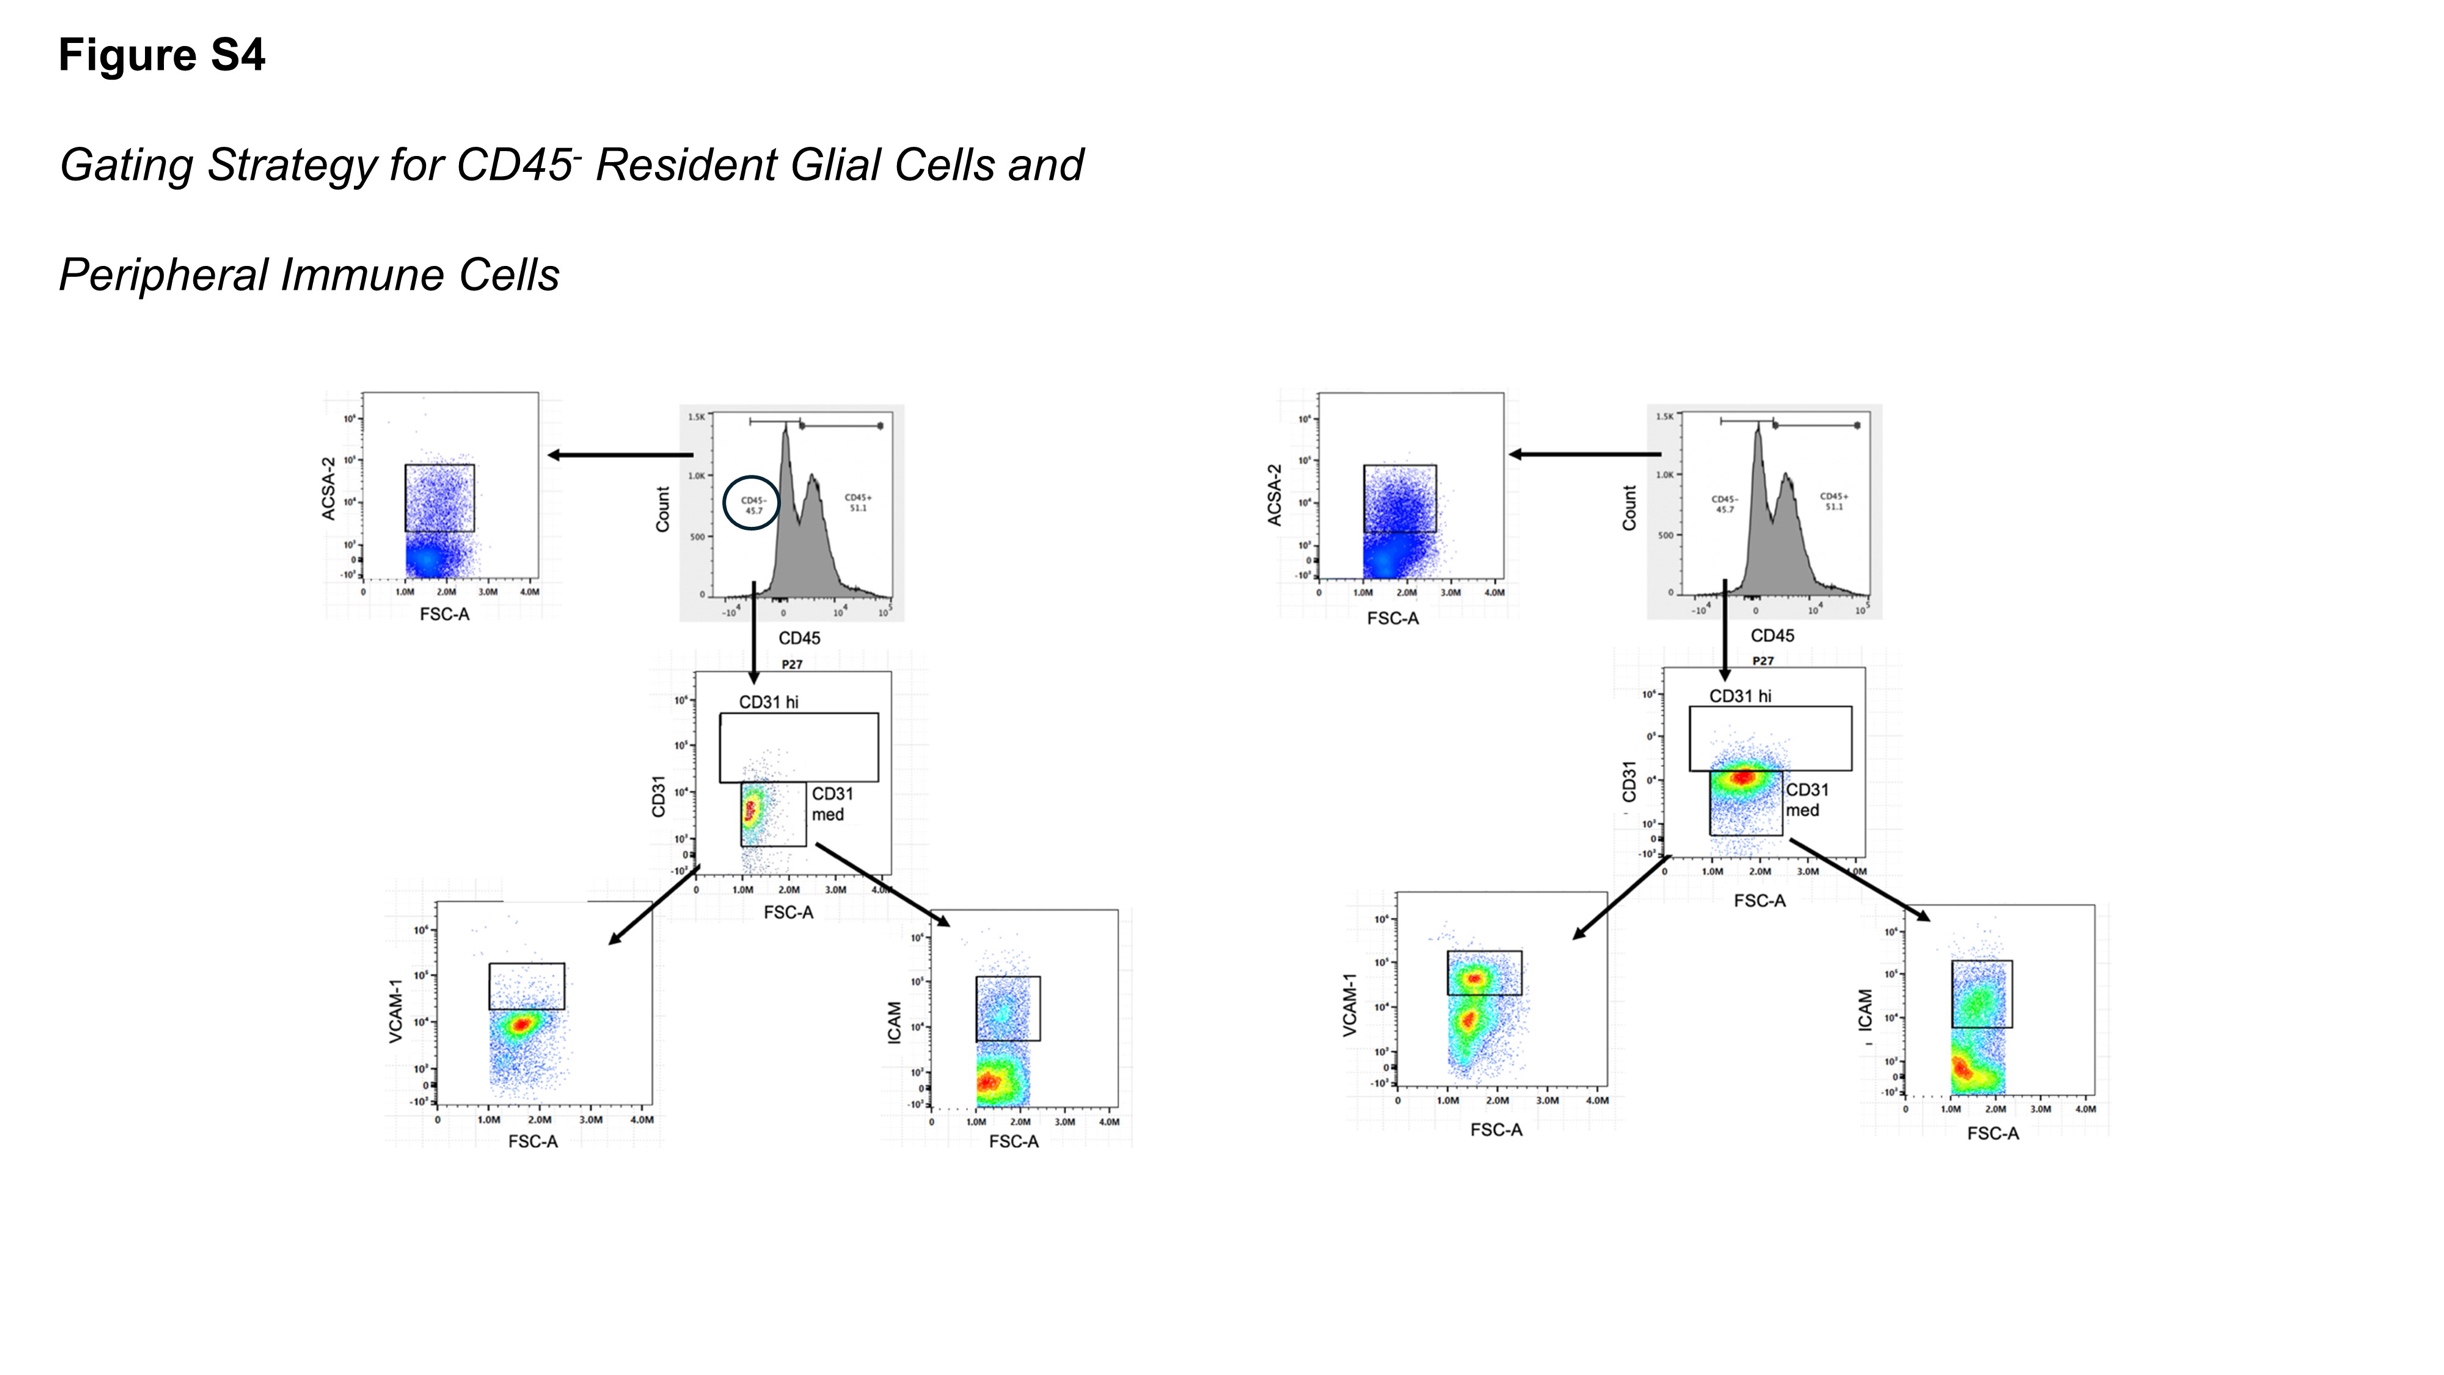


Woodsmoke


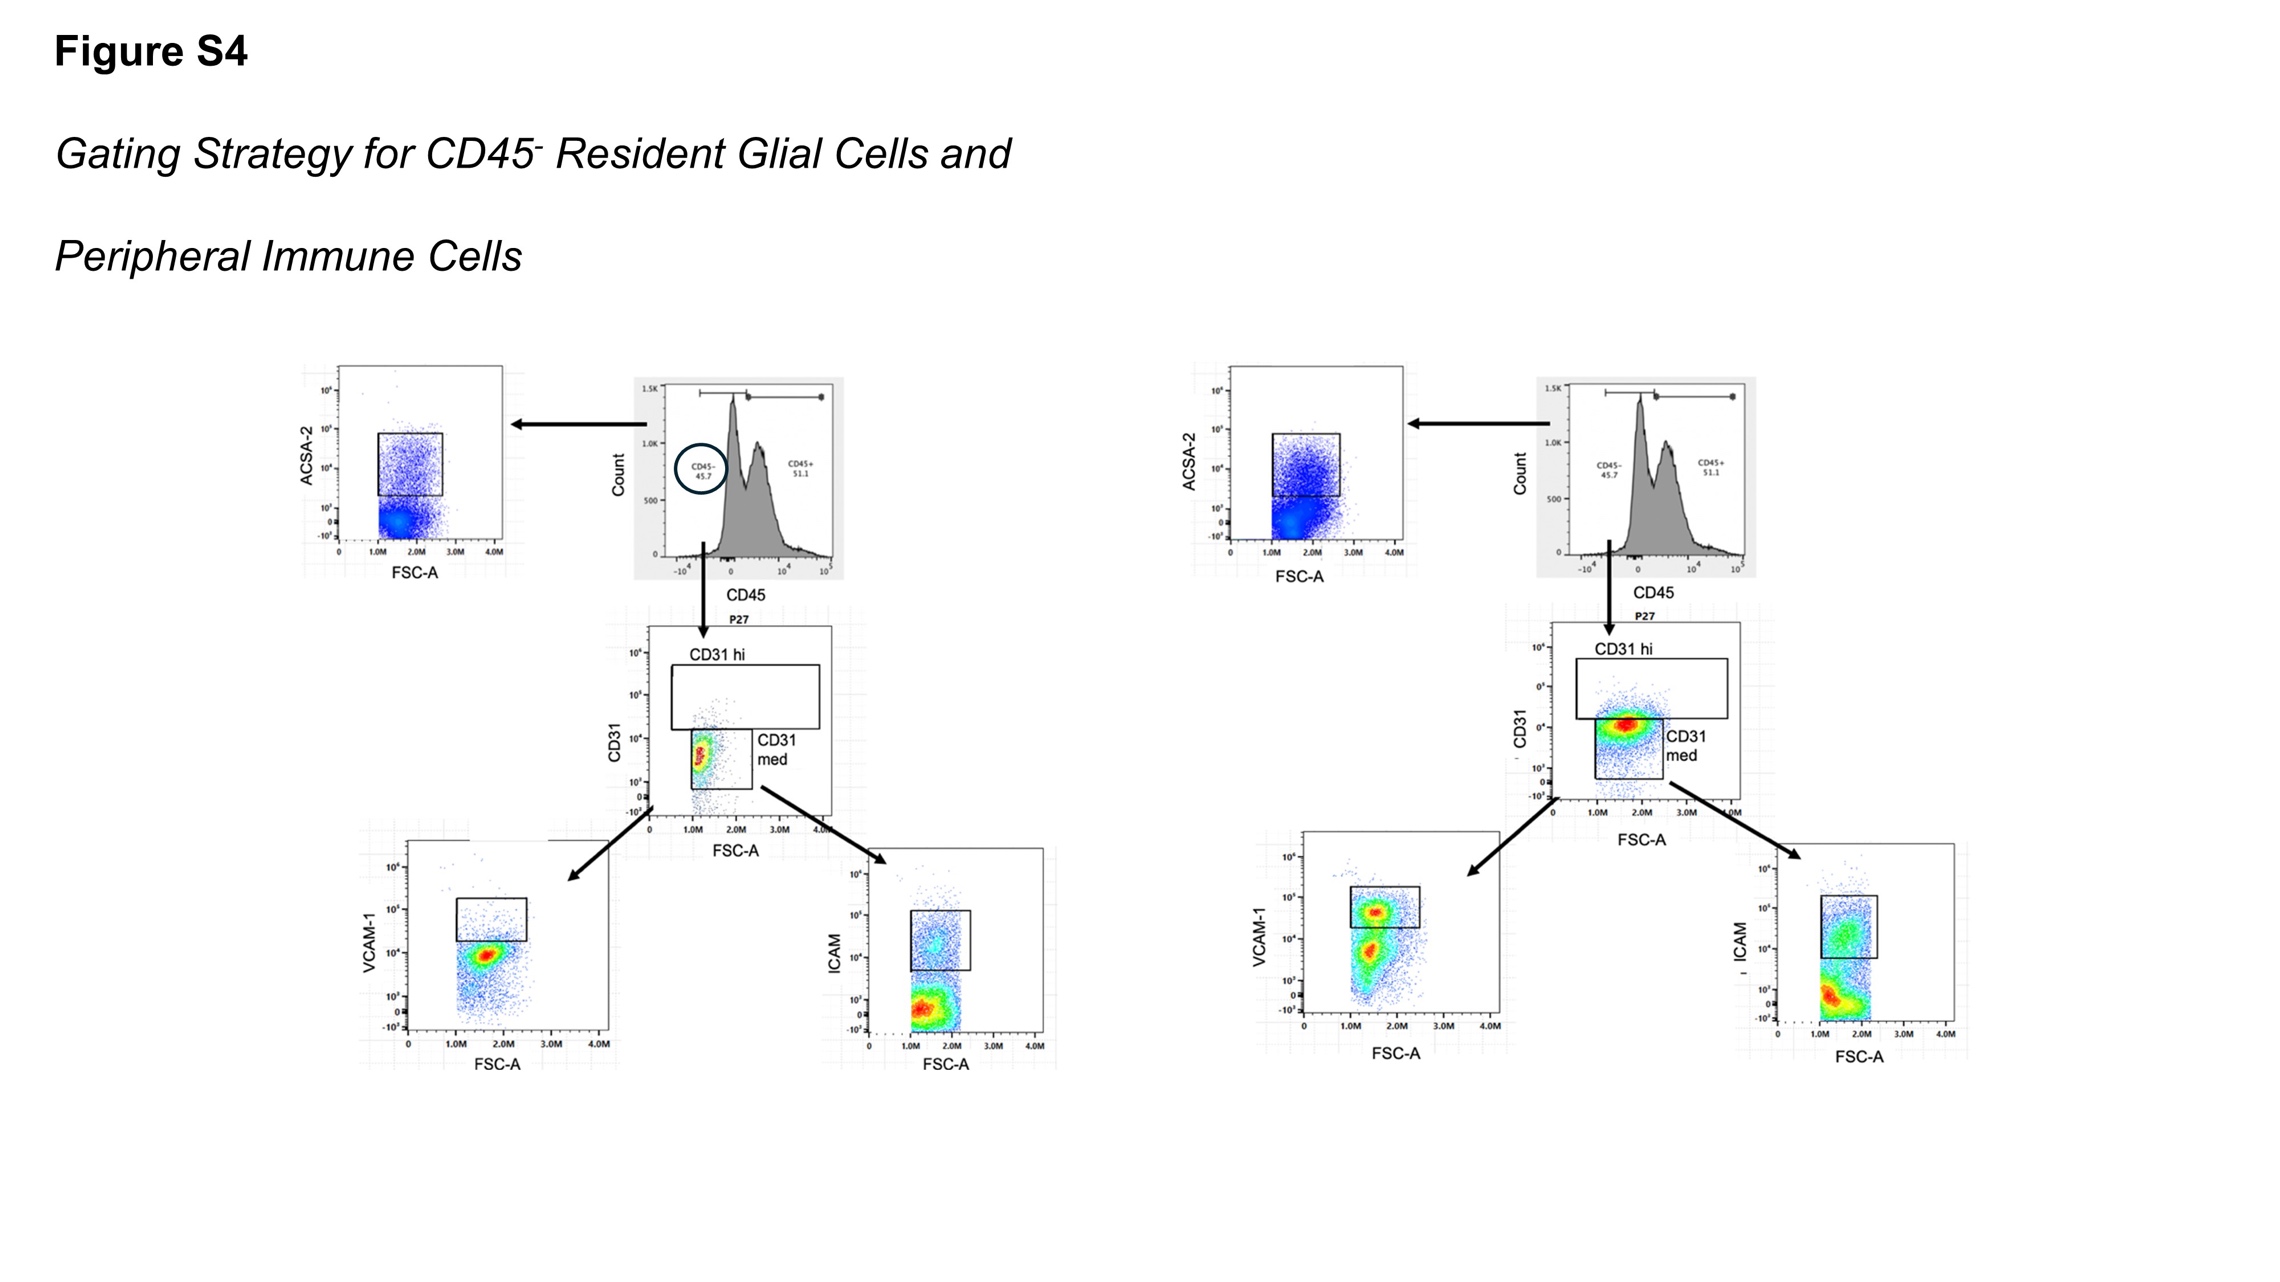


**Figure S6**

ANOVA Interaction Tables 1, 14, and 28 Days Post Exposure

| 1 Day Post Exposure |
| --- |
| CD4 T cells |
| Source of Variation | P Value | Significant? | P Value Summary |
| Interaction (Diet vs Exposure) | 0.004323 | Yes | ** |
| Row Factor (WS vs FA) | 0.032117 | Yes | * |
| Column Factor (SC vs CO) | 0.088433 | No |  |
|  |  |  |  |
| LFA-1 |  |  |  |
| Source of Variation | P Value | Significant? |  |
| Interaction (Diet vs Exposure) | 0.000089 | Yes | **** |
| Row Factor (WS vs FA) | 0.000457 | Yes | *** |
| Column Factor (SC vs CO) | 0.005788 | Yes | ** |
|  |  |  |  |
| Macrophages |  |  |  |
| Source of Variation | P Value | Significant? |  |
| Interaction (Diet vs Exposure) | 0.097122 | No |  |
| Row Factor (WS vs FA) | 0.000089 | Yes | **** |
| Column Factor (SC vs CO) | 0.006124 | Yes | ** |
|  |  |  |  |
| CD31 |  |  |  |
| Source of Variation |  |  |  |
| Interaction (Diet vs Exposure) | 0.073221 | No |  |
| Row Factor (WS vs FA) | 0.004469 | Yes | ** |
| Column Factor (SC vs CO) | 0.238966 | No |  |
|  |  |  |  |
| VCAM |  |  |  |
| Source of Variation | P Value | Significant? |  |
| Interaction (Diet vs Exposure) | 0.077821 | Yes | * |
| Row Factor (WS vs FA) | 0.029674 | Yes | * |
| Column Factor (SC vs CO) | 0.120023 | No |  |
|  |  |  |  |
| ICAM |  |  |  |
| Source of Variation | P Value | Significant? |  |
| Interaction (Diet vs Exposure) | 0.088237 | Yes | *** |
| Row Factor (WS vs FA) | 0.004351 | Yes | ** |
| Column Factor (SC vs CO) | 0.103499 | No |  |
|  |  |  |  |

B

| 14 Days Post Exposure |
| --- |
| CD4 T cells |
| Source of Variation | P Value | Significant? | P Value Summary |
| Interaction (Diet vs Exposure) | 0.007659 | Yes | ** |
| Row Factor (WS vs FA) | 0.032112 | Yes | ** |
| Column Factor (SC vs CO) | 0.088433 | No |  |
|  |  |  |  |
| LFA-1 |  |  |  |
| Source of Variation | P Value | Significant? |  |
| Interaction (Diet vs Exposure) | 0.297761 | No |  |
| Row Factor (WS vs FA) | 0.488076 | No |  |
| Column Factor (SC vs CO) | 0.061198 | No |  |
|  |  |  |  |
| Macrophages |  |  |  |
| Source of Variation | P Value | Significant? |  |
| Interaction (Diet vs Exposure) | 0.229011 | No |  |
| Row Factor (WS vs FA) | 0.005892 | Yes | ** |
| Column Factor (SC vs CO) | 0.002980 | Yes | ** |
|  |  |  |  |
| CD31 |  |  |  |
| Source of Variation |  |  |  |
| Interaction (Diet vs Exposure) | 0.673221 | No |  |
| Row Factor (WS vs FA) | 0.034690 | Yes | * |
| Column Factor (SC vs CO) | 0.203885 | No |  |
|  |  |  |  |
| VCAM |  |  |  |
| Source of Variation | P Value | Significant? |  |
| Interaction (Diet vs Exposure) | 0.000089 | Yes | **** |
| Row Factor (WS vs FA) | 0.000099 | Yes | **** |
| Column Factor (SC vs CO) | 0.005590 | No | ** |
|  |  |  |  |
| ICAM |  |  |  |
| Source of Variation | P Value | Significant? |  |
| Interaction (Diet vs Exposure) | 0.608237 | No |  |
| Row Factor (WS vs FA) | 0.344353 | No |  |
| Column Factor (SC vs CO) | 0.445091 | No |  |
|  |  |  |  |

C

| 28 Days Post Exposure |
| --- |
| CD4 T cells |
| Source of Variation | P Value | Significant? | P Value Summary |
| Interaction (Diet vs Exposure) | 0.000056 | Yes | **** |
| Row Factor (WS vs FA) | 0.000042 | Yes | **** |
| Column Factor (SC vs CO) | 0.030983 | Yes | * |
|  |  |  |  |
| LFA-1 |  |  |  |
| Source of Variation | P Value | Significant? |  |
| Interaction (Diet vs Exposure) | 0.176437 | No |  |
| Row Factor (WS vs FA) | 0.118964 | No |  |
| Column Factor (SC vs CO) | 0.097861 | No |  |
|  |  |  |  |
| Macrophages |  |  |  |
| Source of Variation | P Value | Significant? |  |
| Interaction (Diet vs Exposure) | 0.229011 | No |  |
| Row Factor (WS vs FA) | 0.005892 | Yes | ** |
| Column Factor (SC vs CO) | 0.002980 | Yes | ** |
|  |  |  |  |
| CD31 |  |  |  |
| Source of Variation |  |  |  |
| Interaction (Diet vs Exposure) | 0.131498 | No |  |
| Row Factor (WS vs FA) | 0.448297 | No |  |
| Column Factor (SC vs CO) | 0.824743 | No |  |
|  |  |  |  |
| VCAM |  |  |  |
| Source of Variation | P Value | Significant? |  |
| Interaction (Diet vs Exposure) | 0.138277 | No |  |
| Row Factor (WS vs FA) | 0.219387 | No |  |
| Column Factor (SC vs CO) | 0.078498 | No |  |
|  |  |  |  |
| ICAM |  |  |  |
| Source of Variation | P Value | Significant? |  |
| Interaction (Diet vs Exposure) | 0.608237 | No |  |
| Row Factor (WS vs FA) | 0.004123 | Yes | ** |
| Column Factor (SC vs CO) | 0.007781 | Yes | ** |
|  |  |  |  |

**Figure S7**

*Heatmaps of top 100 significant metabolites*


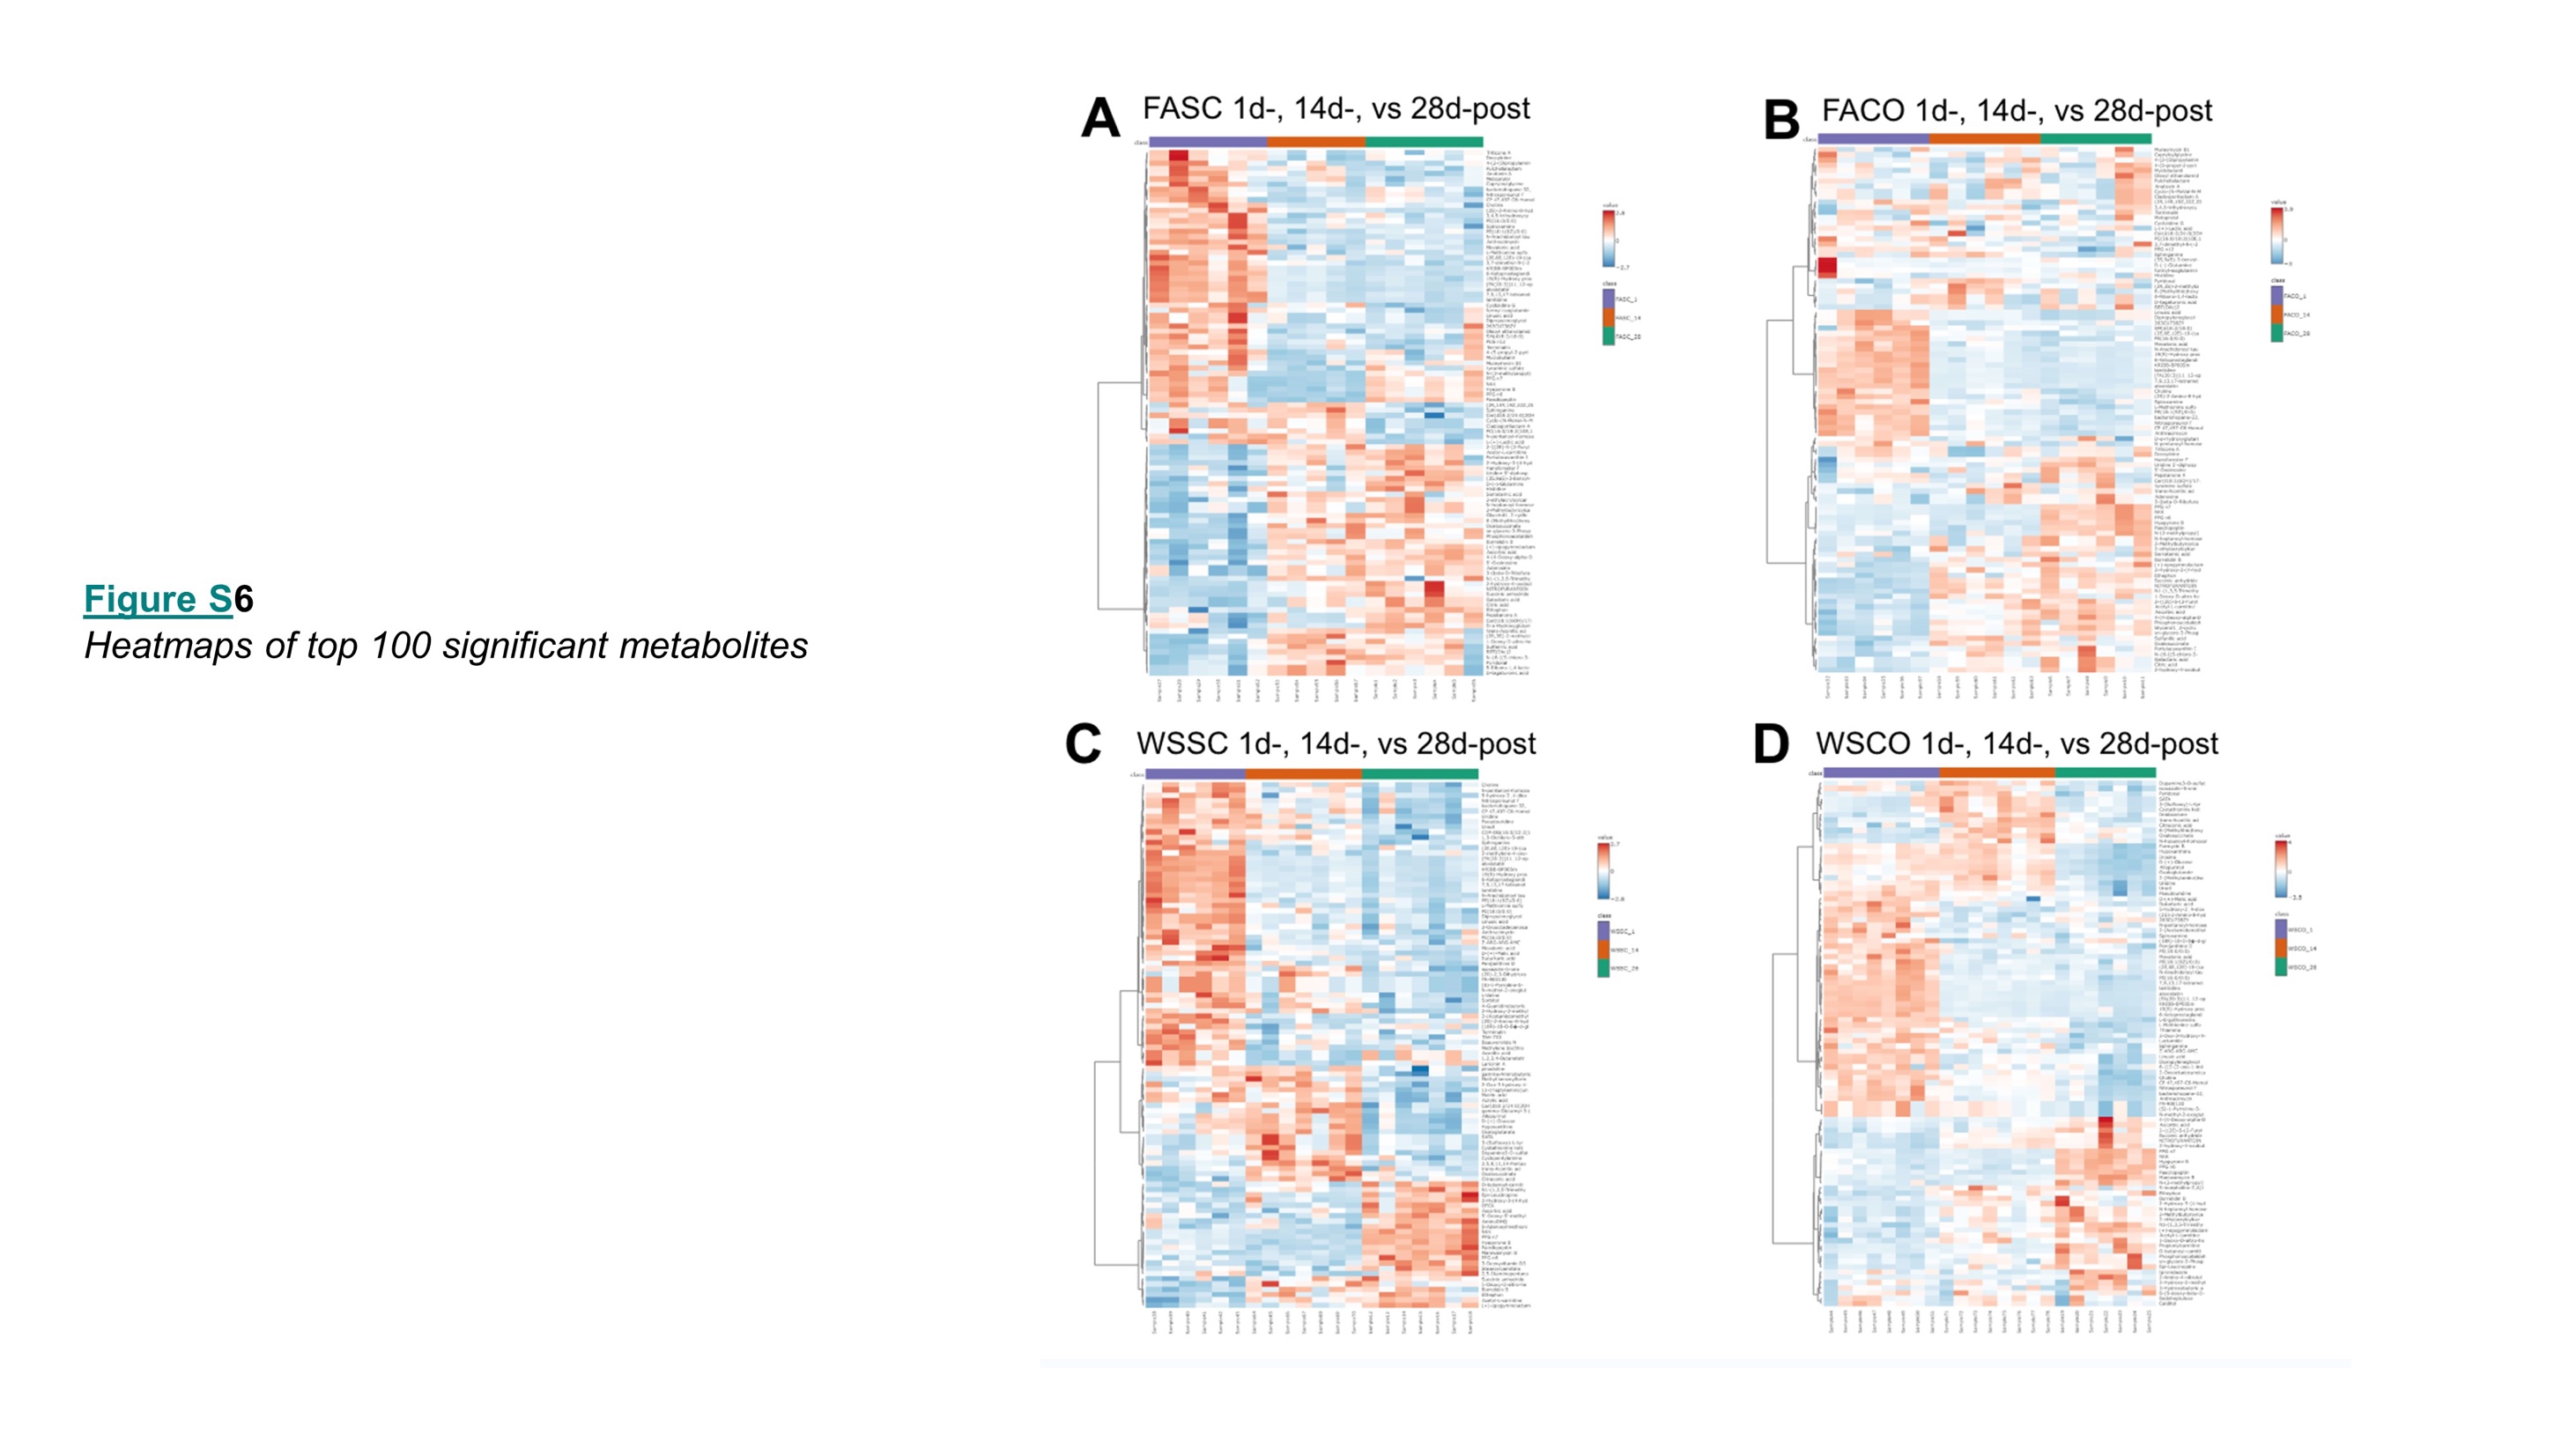


Heatmaps of top 100 significant metabolites by comparing FASC **(A)**, FACO  **(B)**, WSSC **(C)**, and WSCO **(D)** mice that were sacrificed 1-day, 14-days, and 28-days post-exposure.

**Figure S8**

*Significant metabolites with opposite effects between coconut oil diet (CO) and woodsmoke exposure (WS)*

*
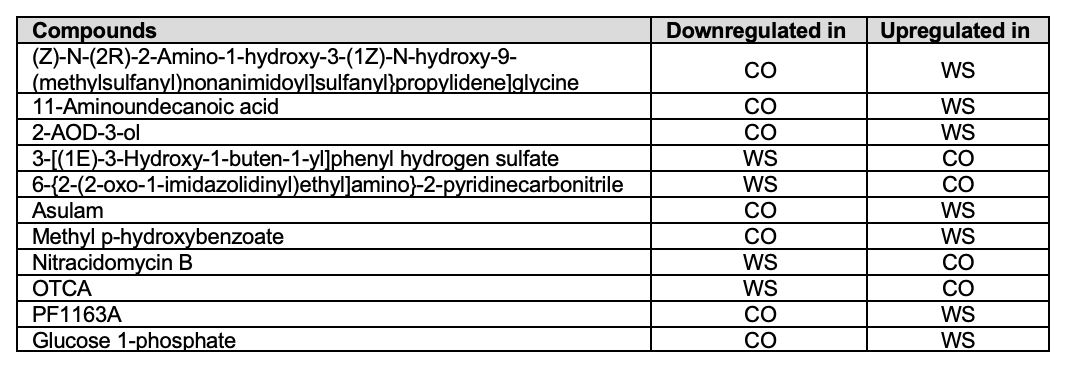
*

**Figure S9**

*Significant metabolites between CO and WS in the PFC*


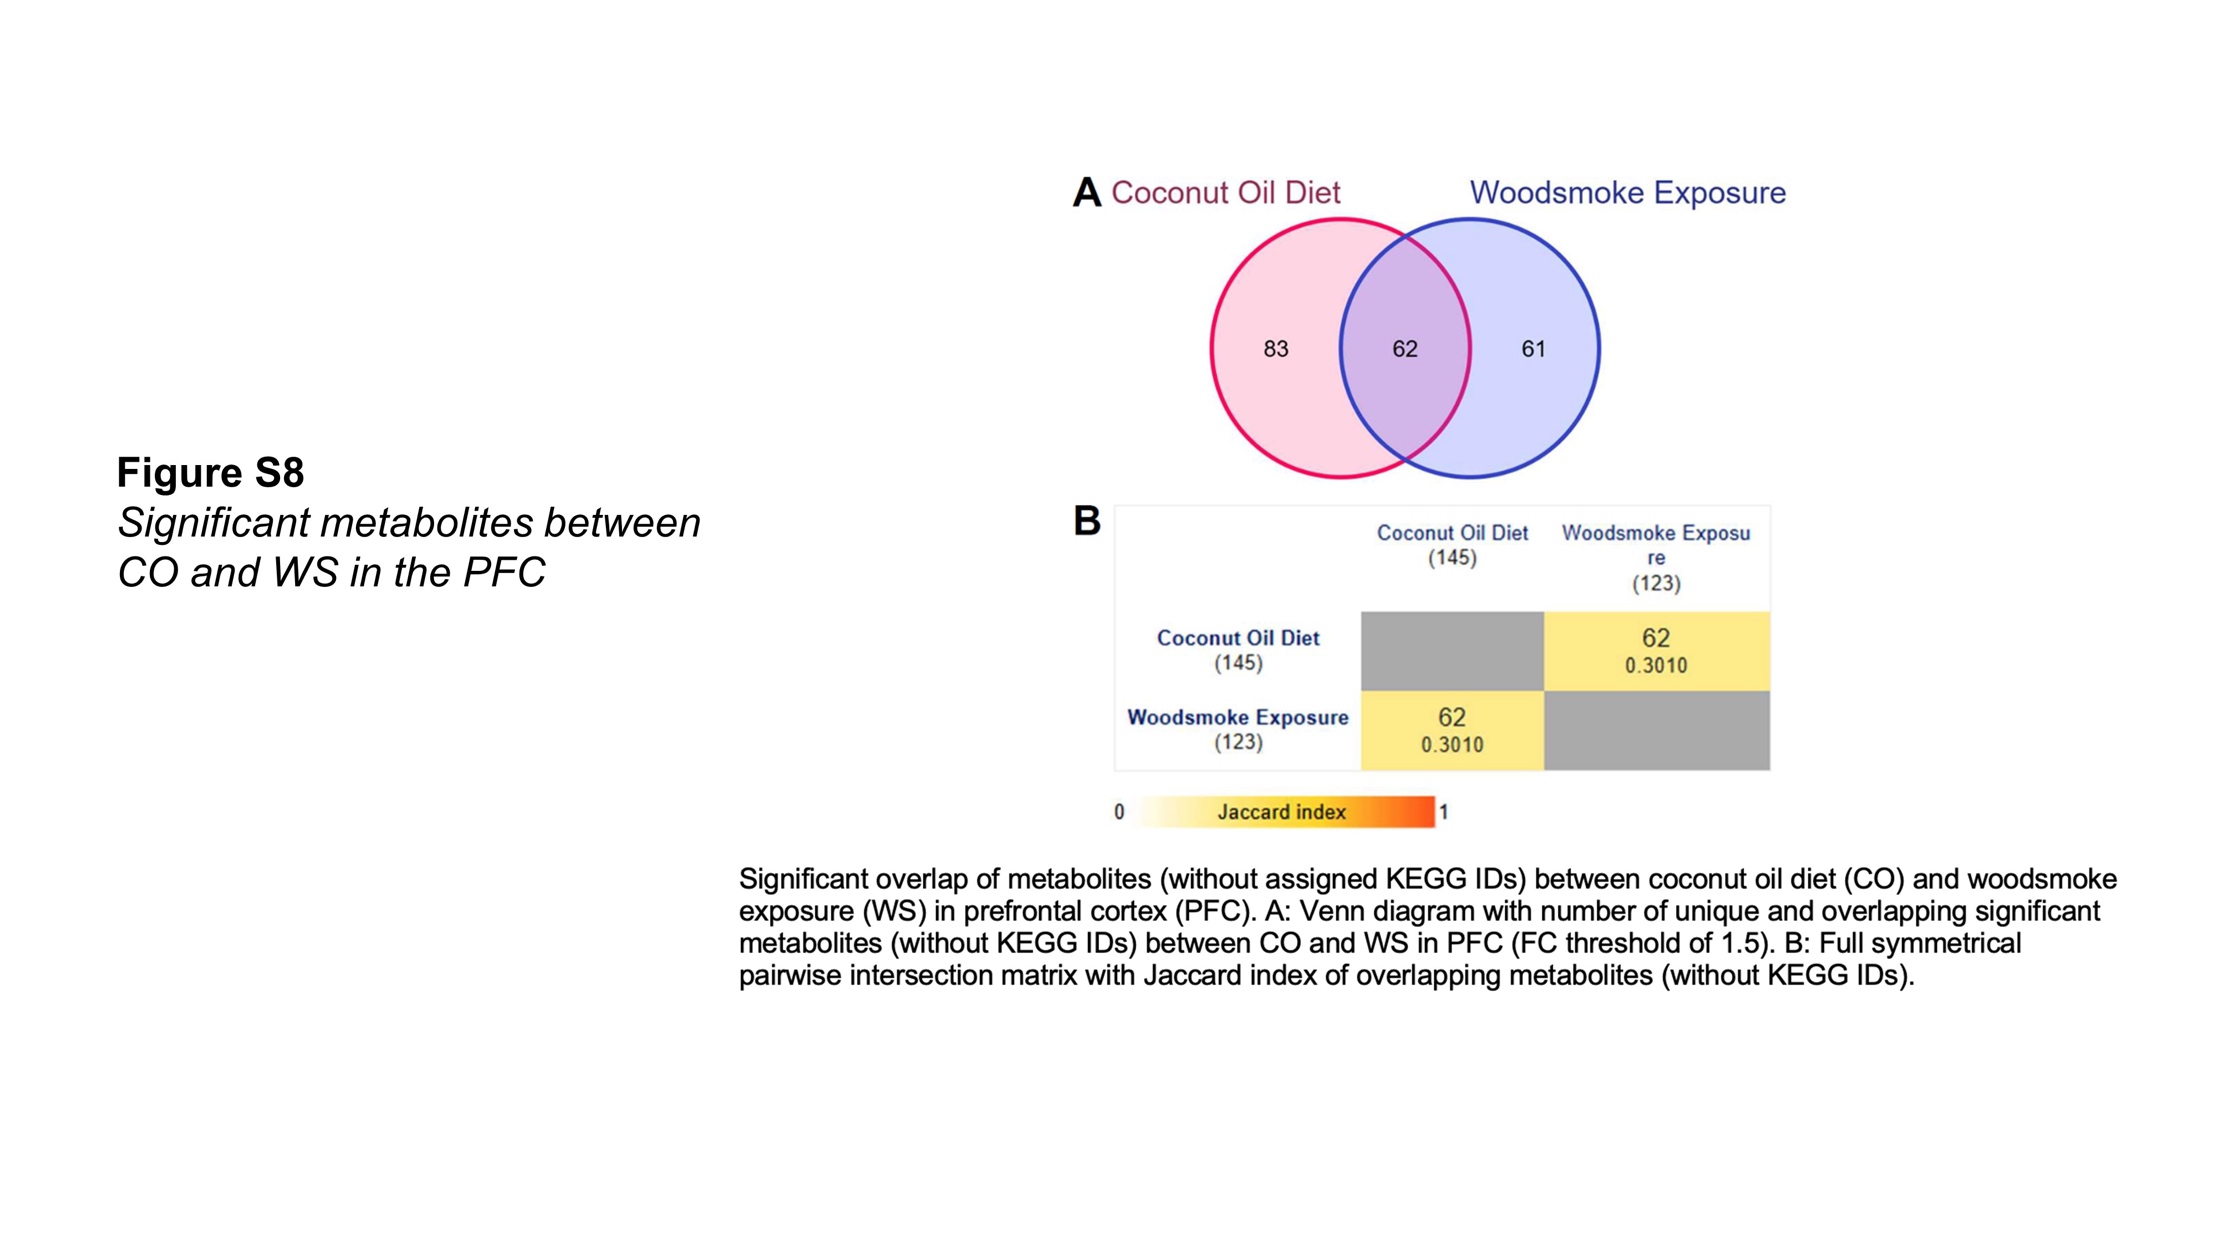


**Figure S10**

*List of unique and overlapping metabolites between CO and* *WS*

(blue, ↓ = downregulation; pink, ↑ = upregulation)


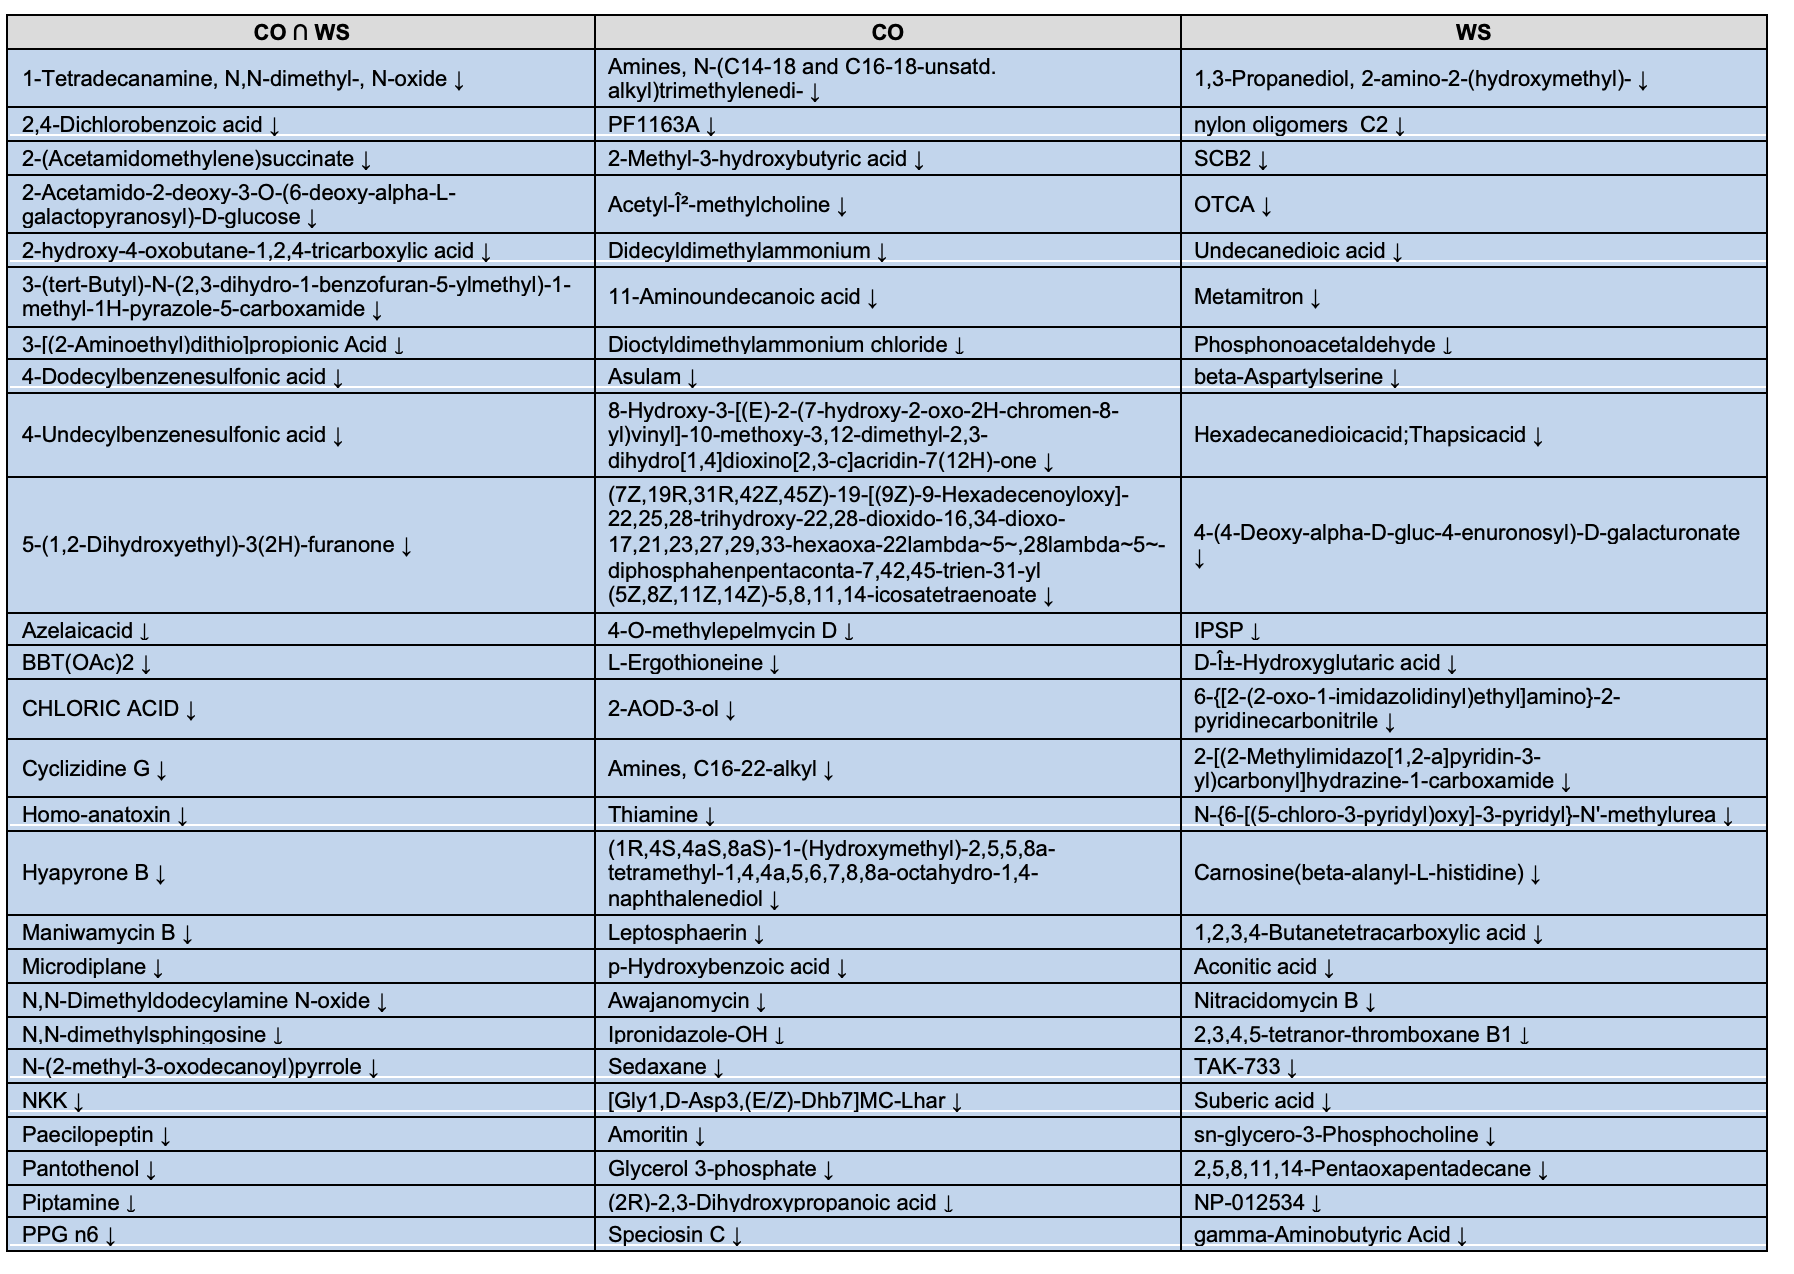


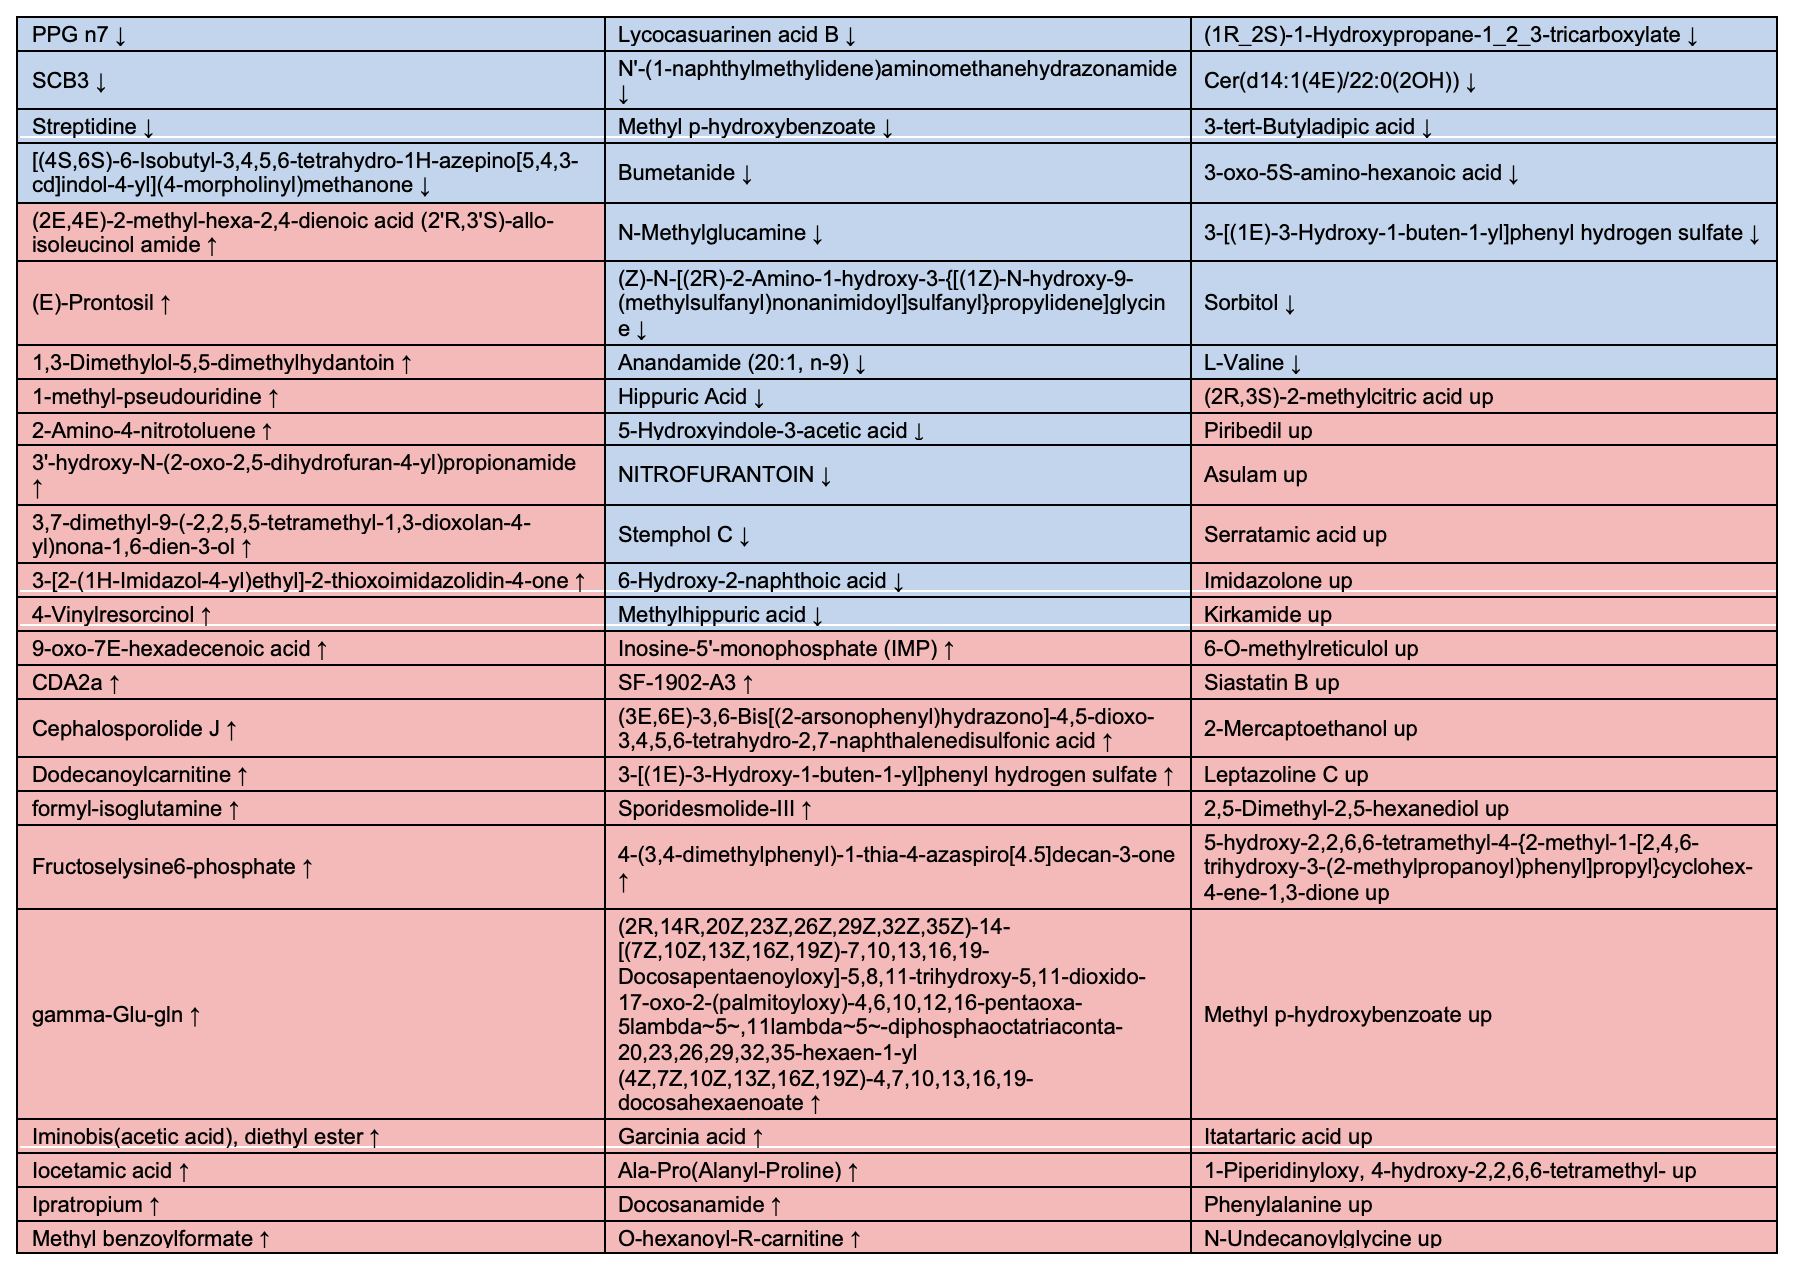


**
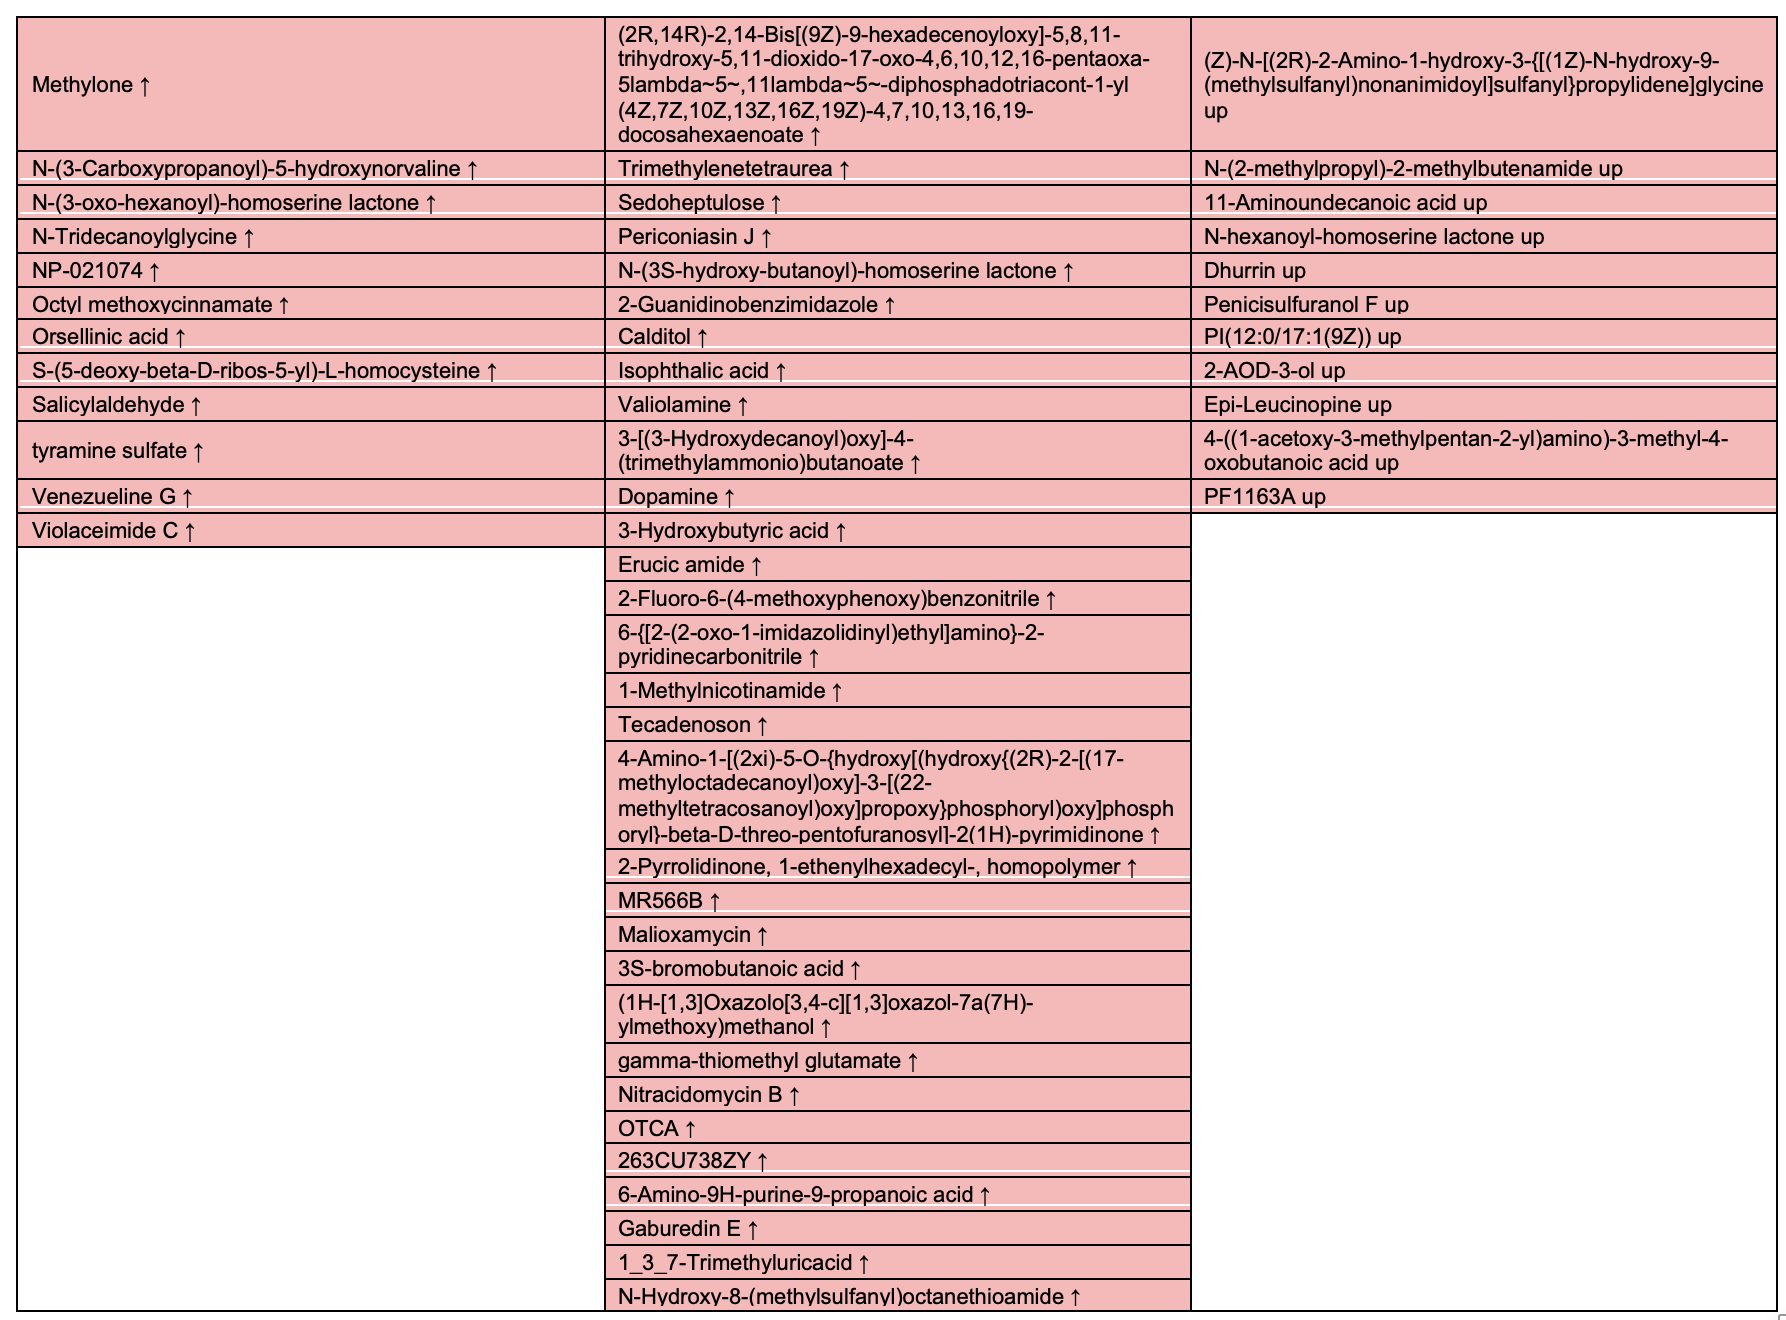
**

**Figure S11**

*Full list of significant metabolites (without assigned KEGG IDs) altered by coconut oil diet (CO) and woodsmoke exposure (WS)* (FC threshold of 1.5).


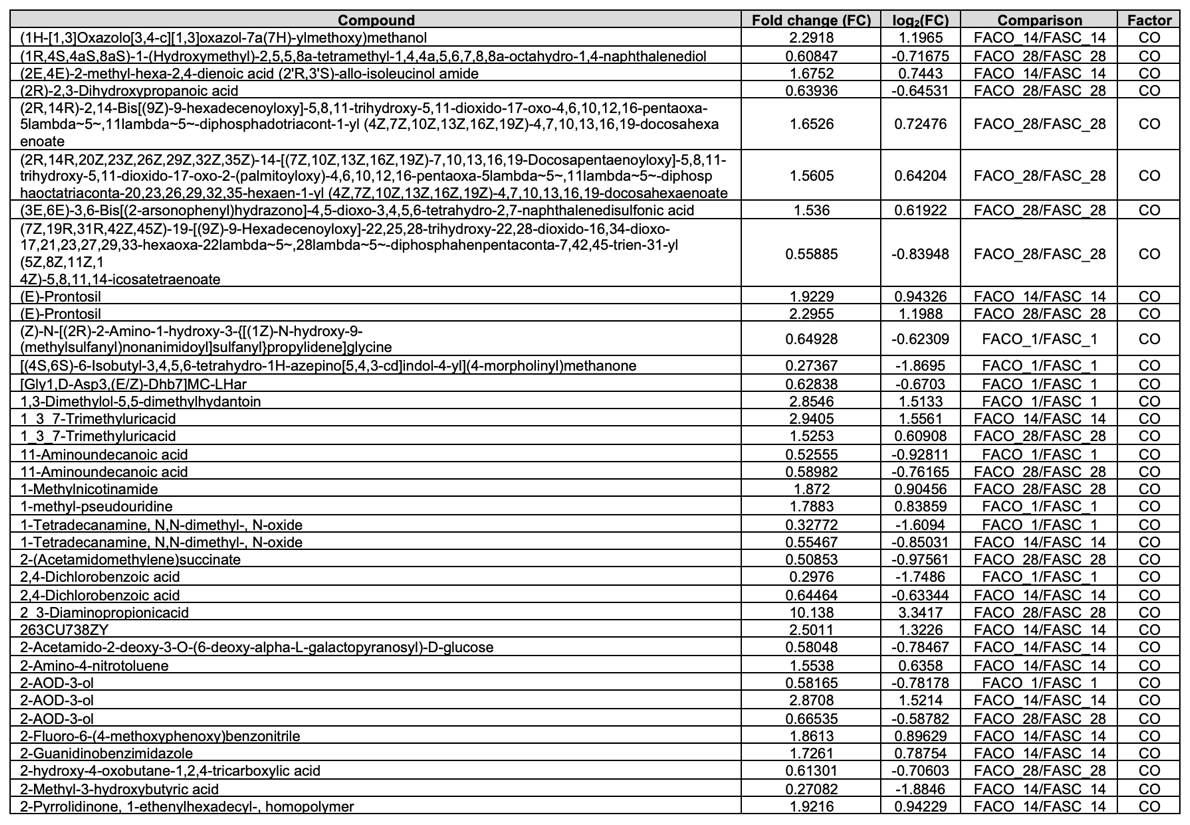


**
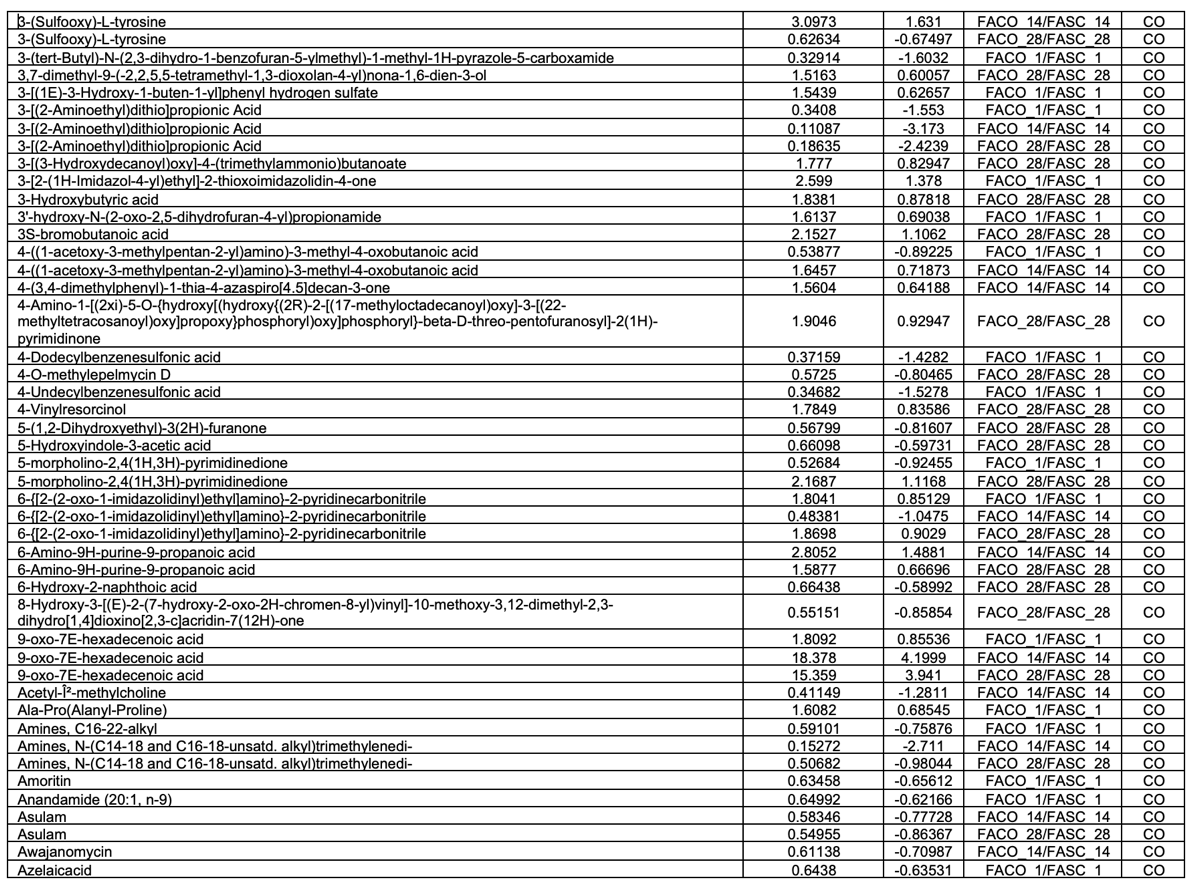
**

**
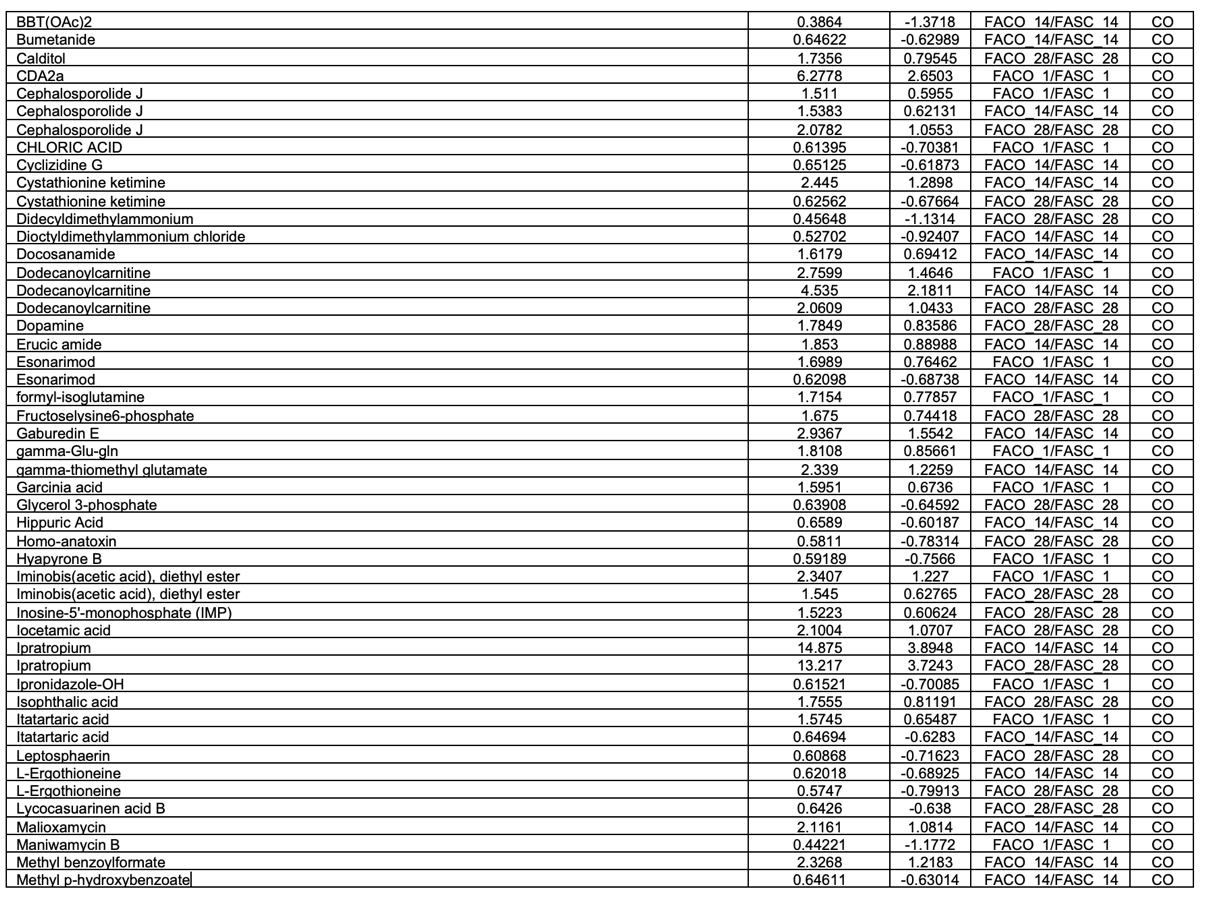
**

**
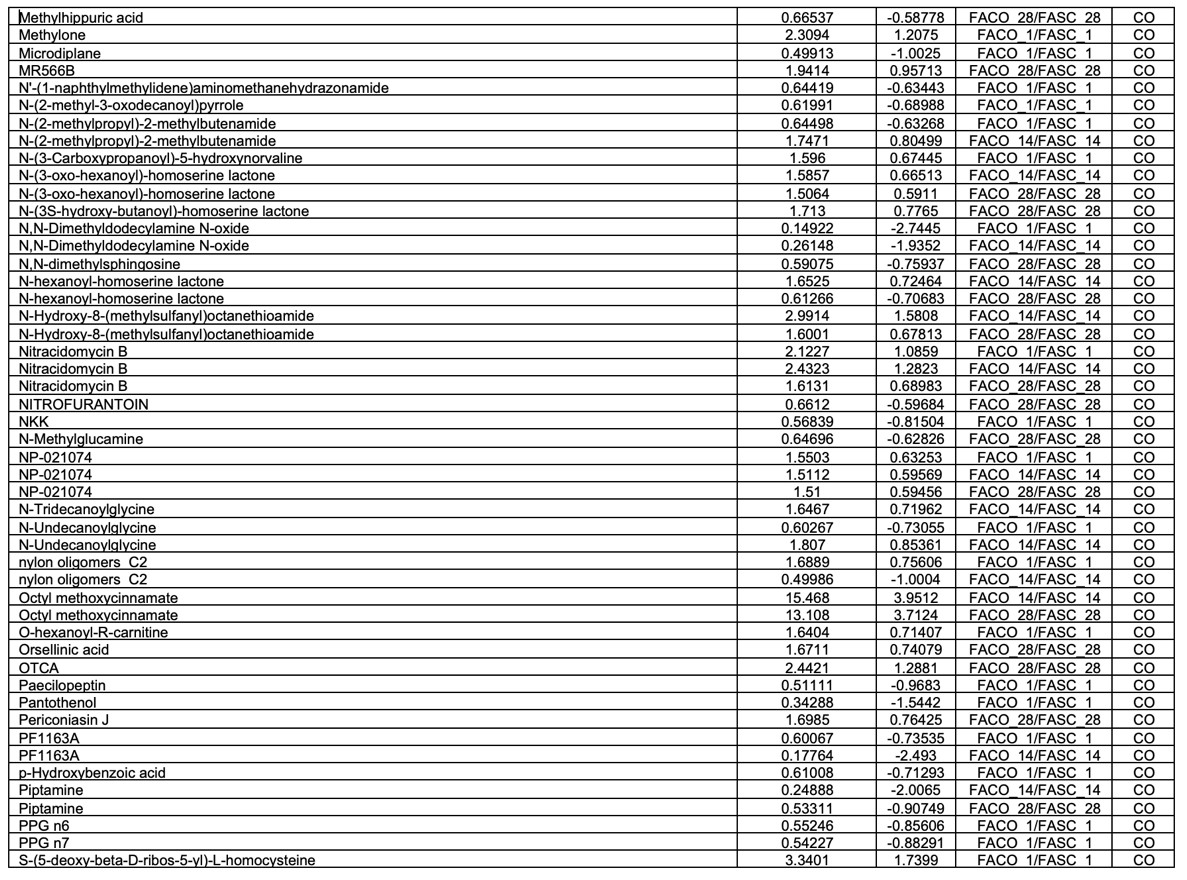
**

**
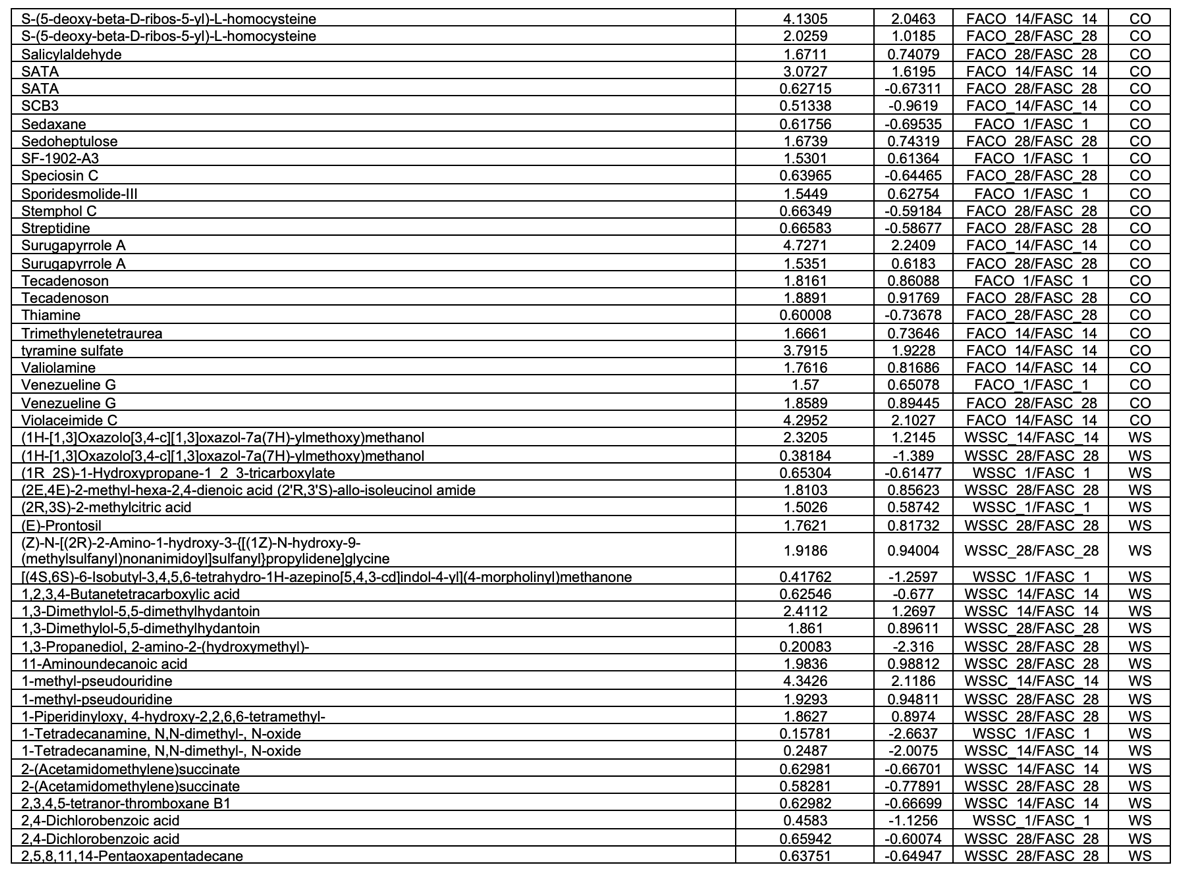
**

**
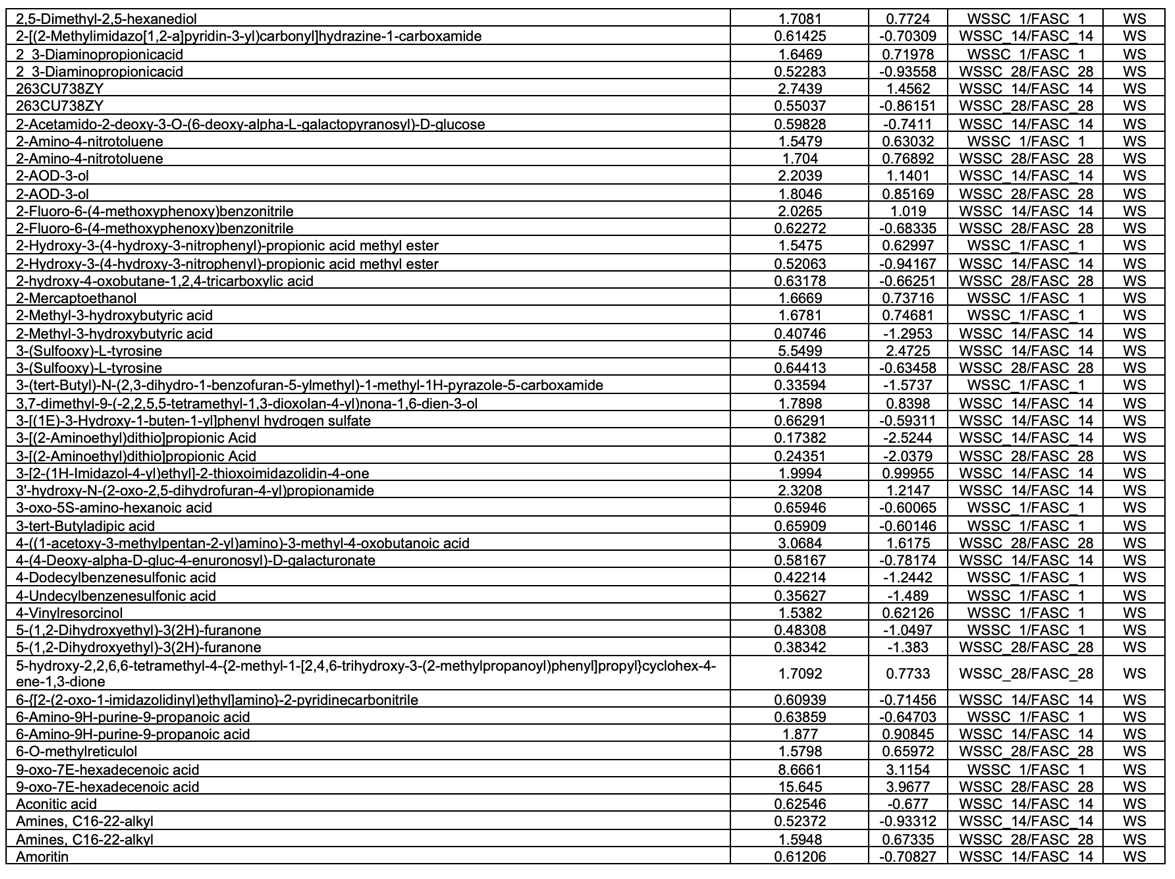
**

*
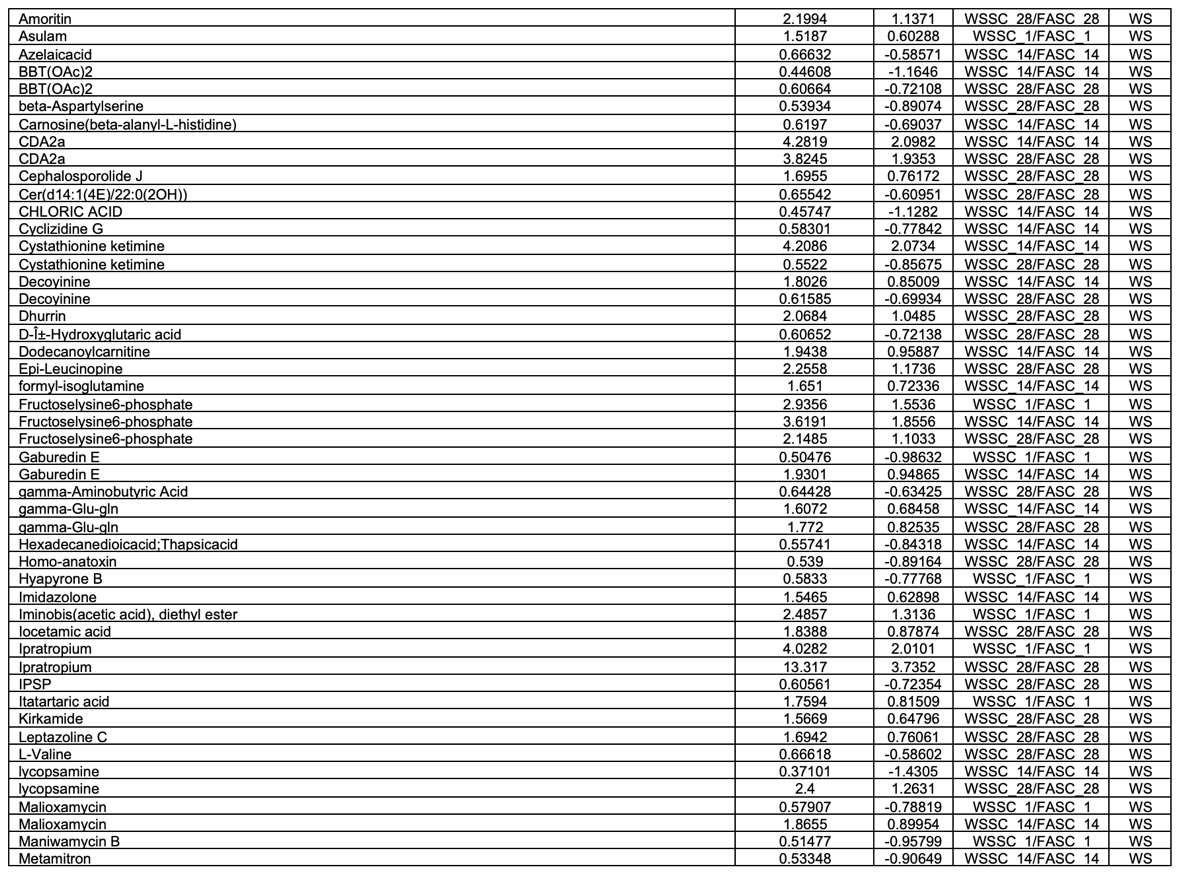
*

*
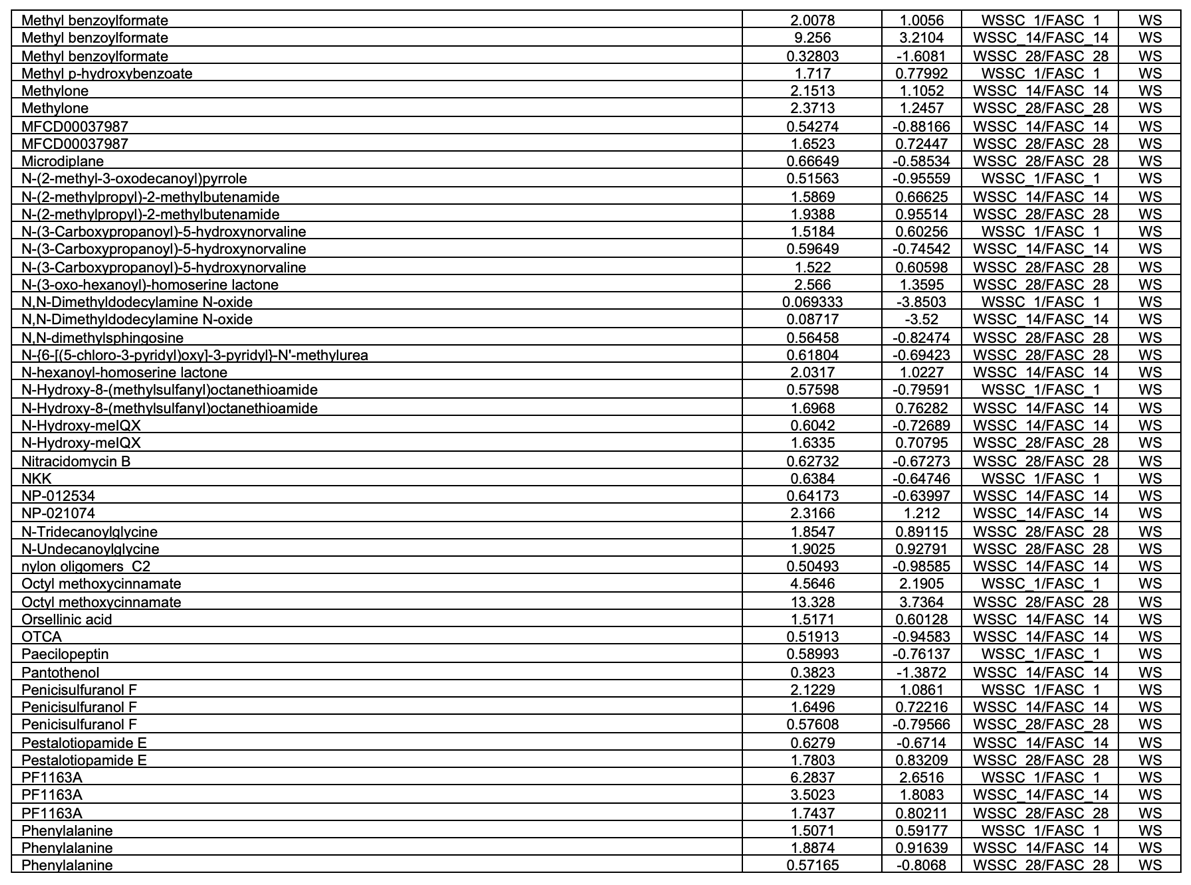
*

*
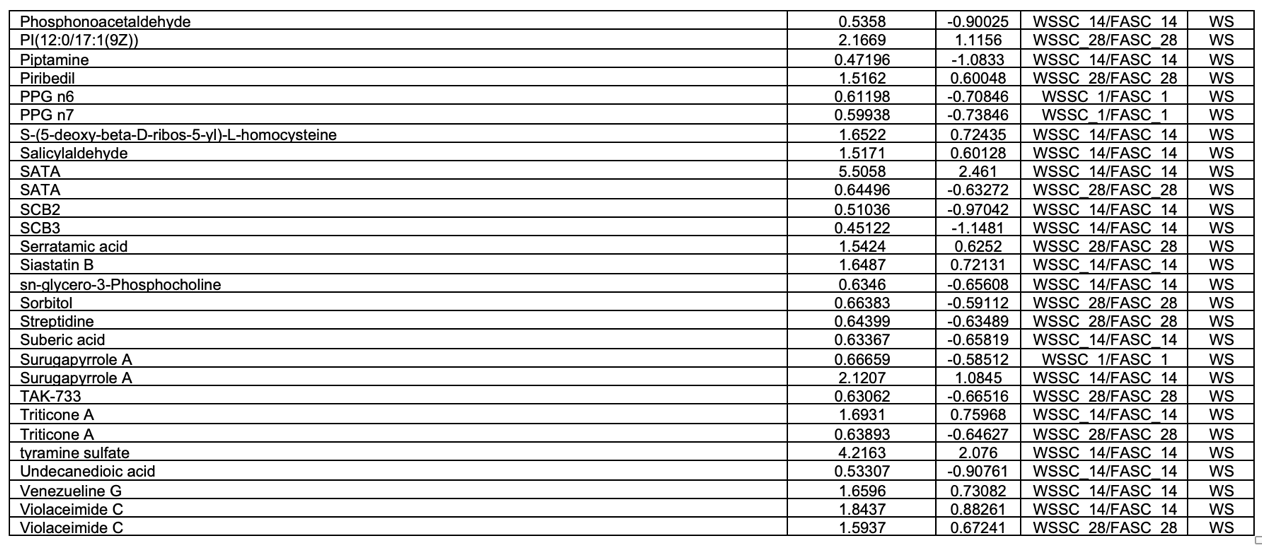
*
